# Supplementary material for: Secretory autophagy maintains proteostasis upon lysosome inhibition
Source: PubMed Central journal article supplement — J Cell Biol. 2022 Apr 21;221(6):e202110151. doi: 10.1083/jcb.202110151 (PMC9036093; doi:10.1083/jcb.202110151), 2022-04-21

LC3 -  
WCL and  
EVPs (100K)  
Panel A

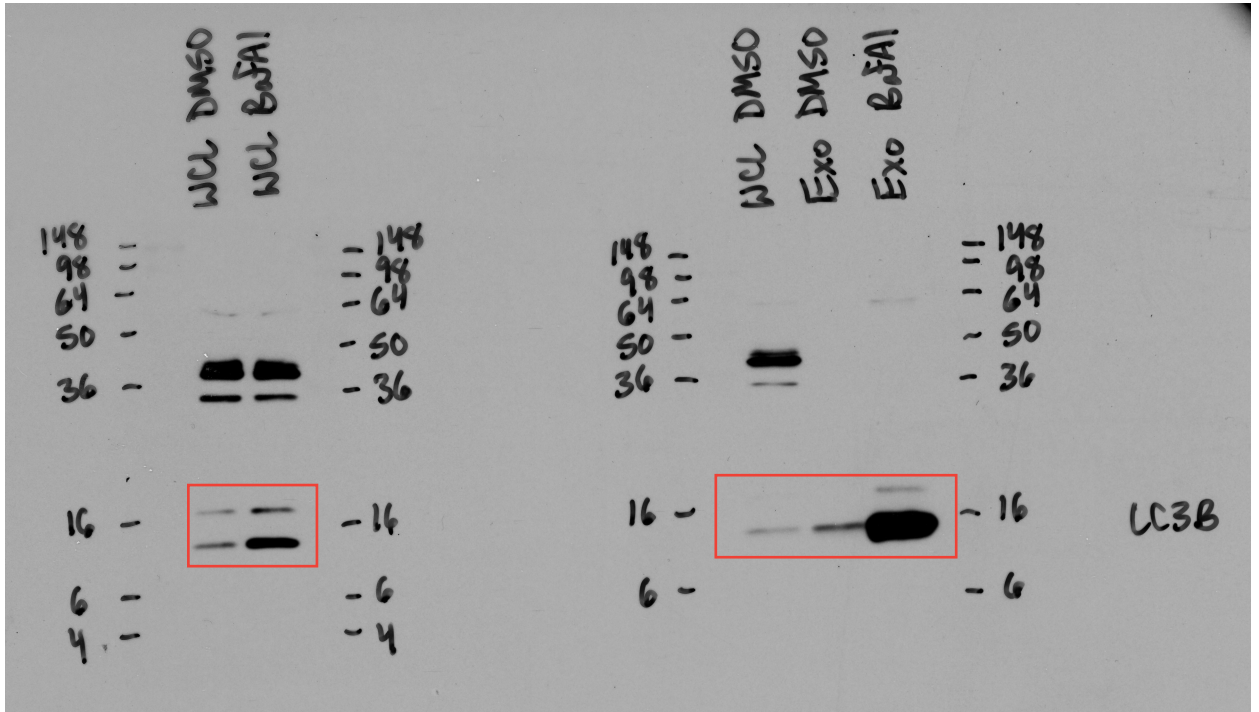

p62 -  
WCL and  
EVPs (100K)  
Panel A

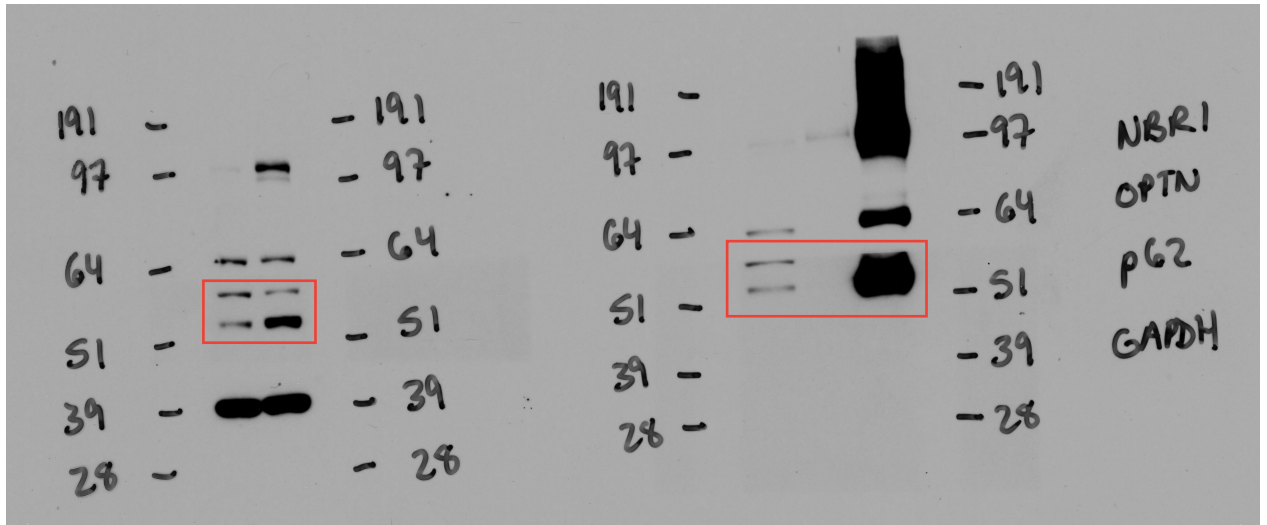

NBR1 -  
WCL and  
EVPs (100K)  
Panel A

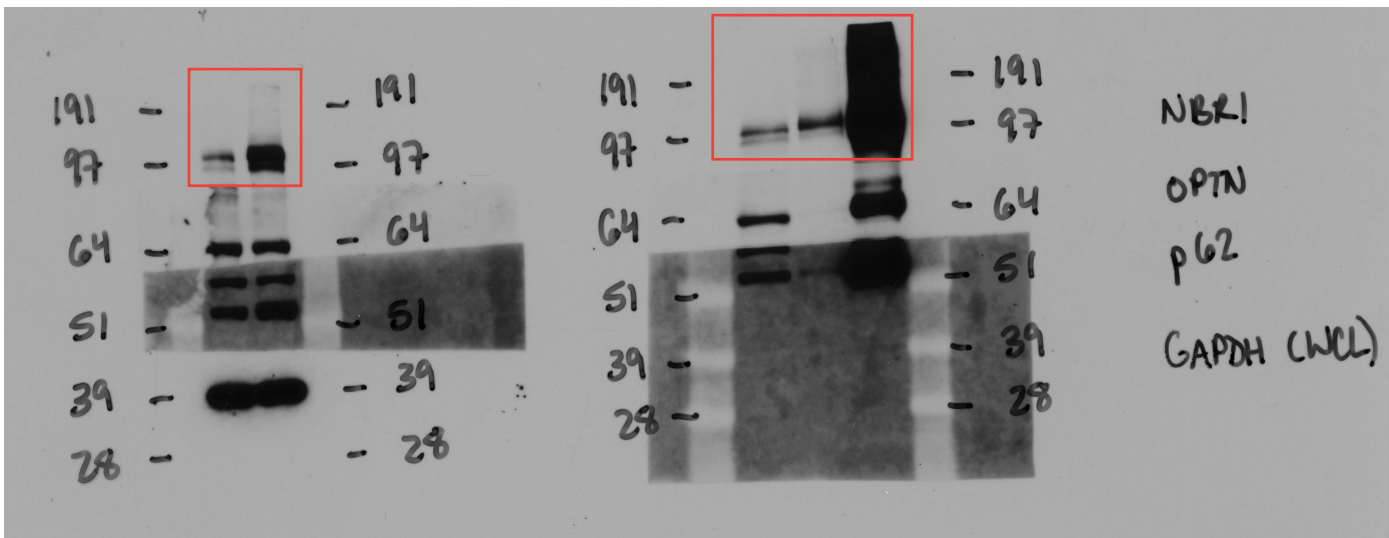

OPTN -  
WCL  
Panel A

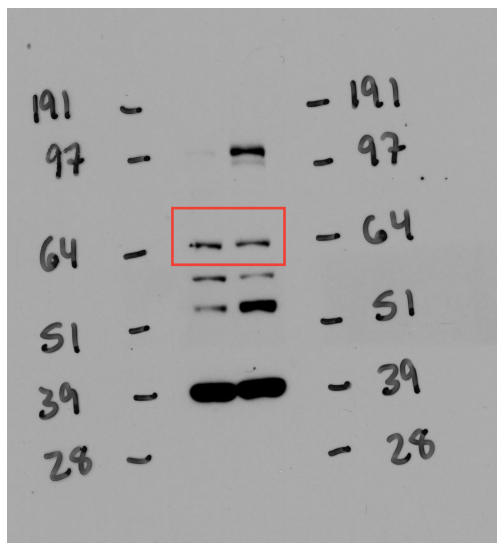

OPTN -  
EVPs (100K)  
Panel A

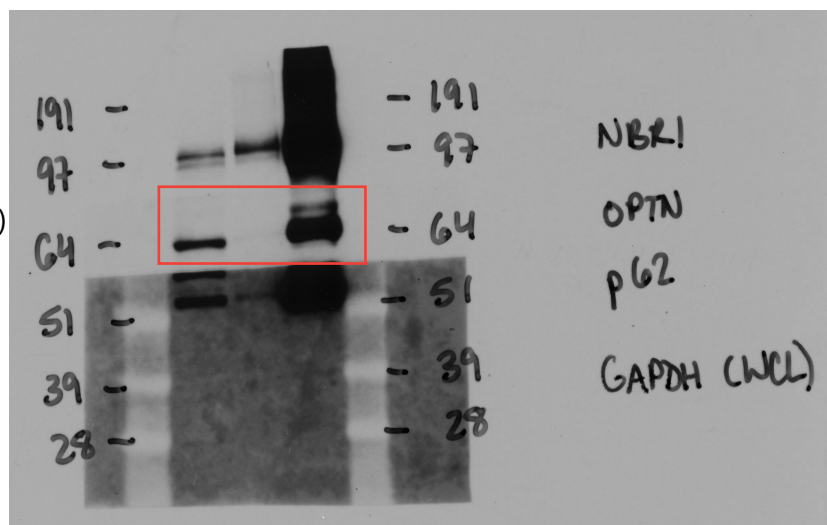

NDP52 -  
WCL and  
EVPs (100K)  
Panel A

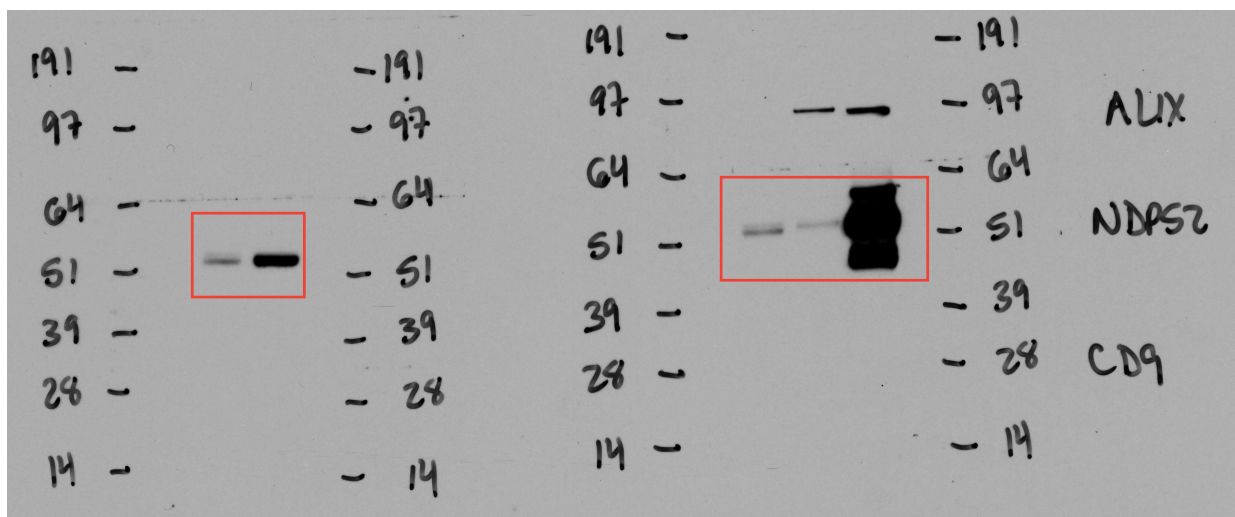

TSG101 -  
WCL and  
EVPs (100K)  
Panel A

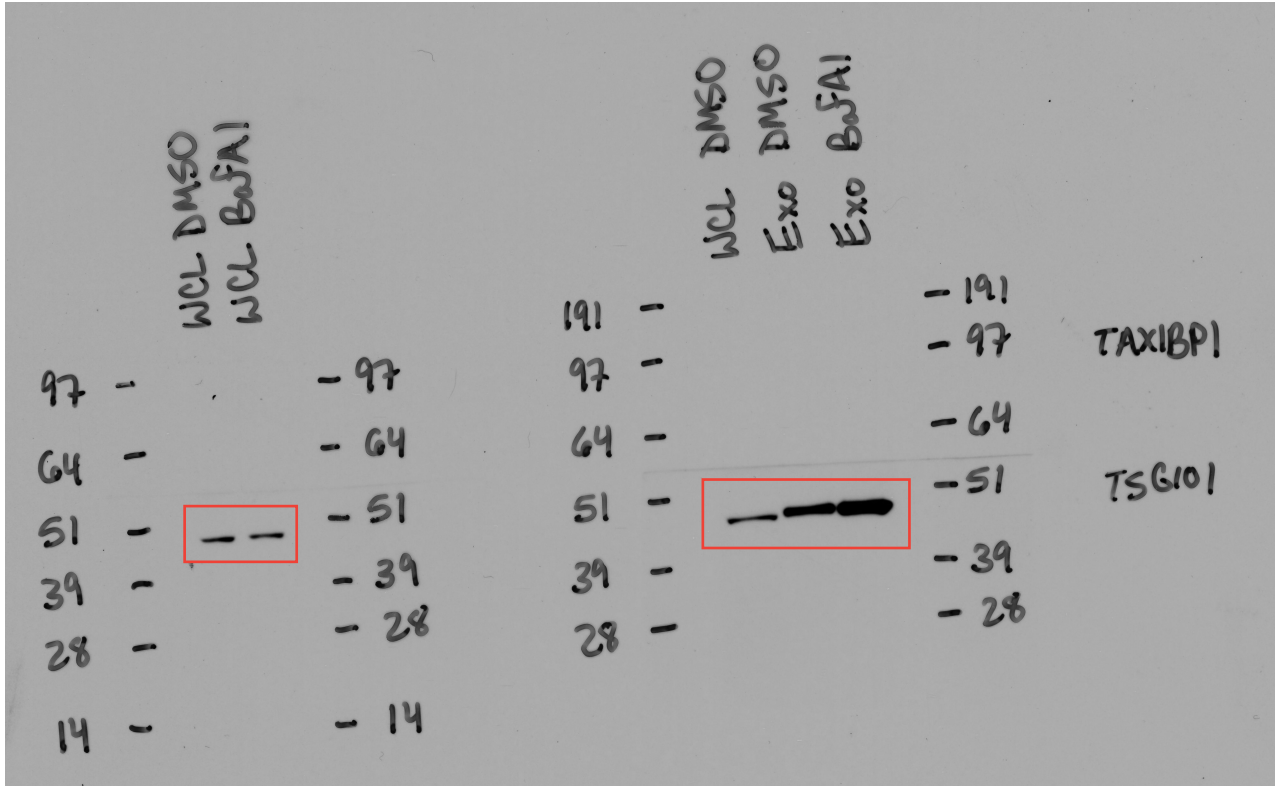

ALIX -  
WCL and  
EVPs (100K)  
Panel A

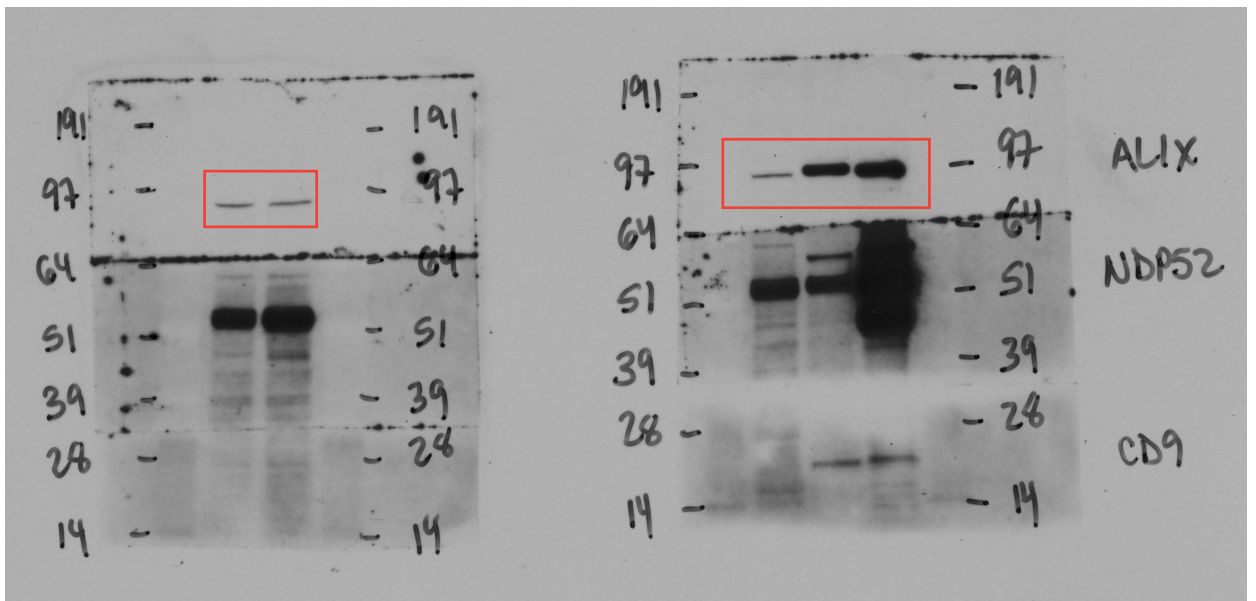

CD9 -  
WCL and  
EVPs (100K)  
Panel A

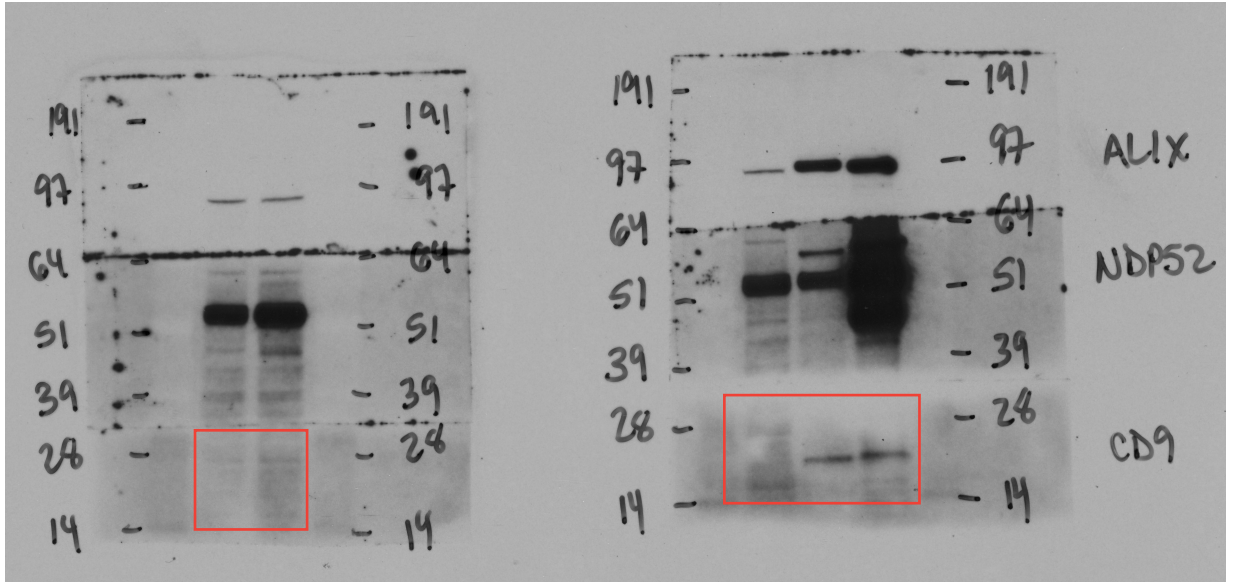

GAPDH -  
WCL  
Panel A

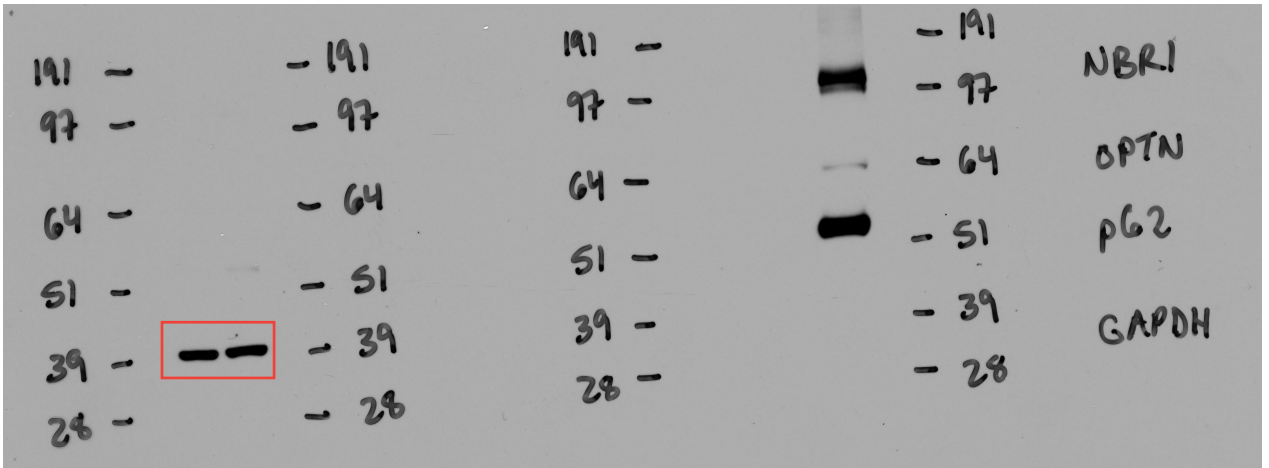

LC3 -  
WCL and  
EVPs (100K)  
Panel C

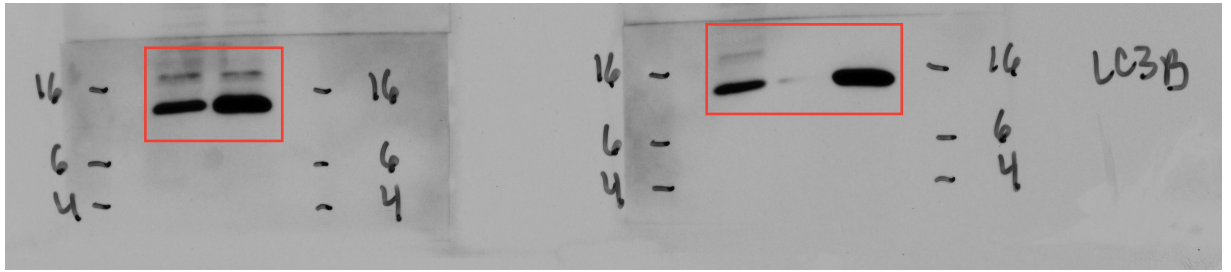

p62 -  
WCL and  
EVPs (100K)  
Panel C

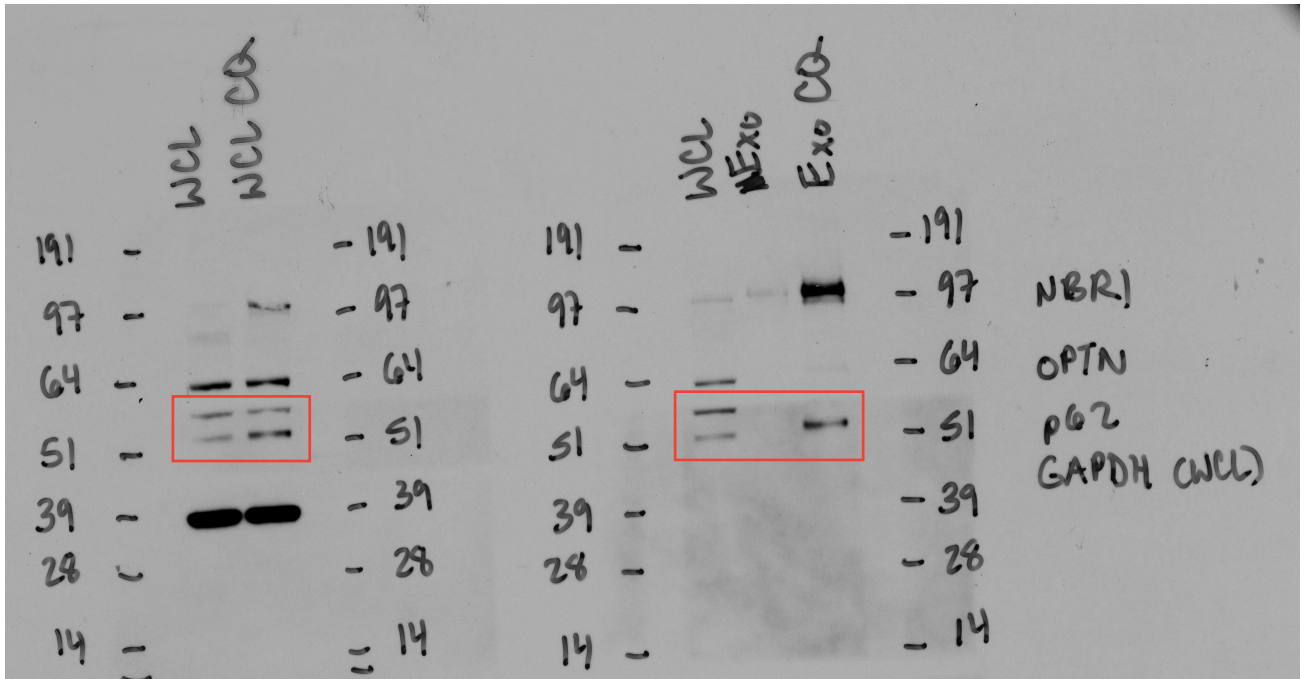

NBR1 -  
WCL and  
EVPs (100K)  
Panel C

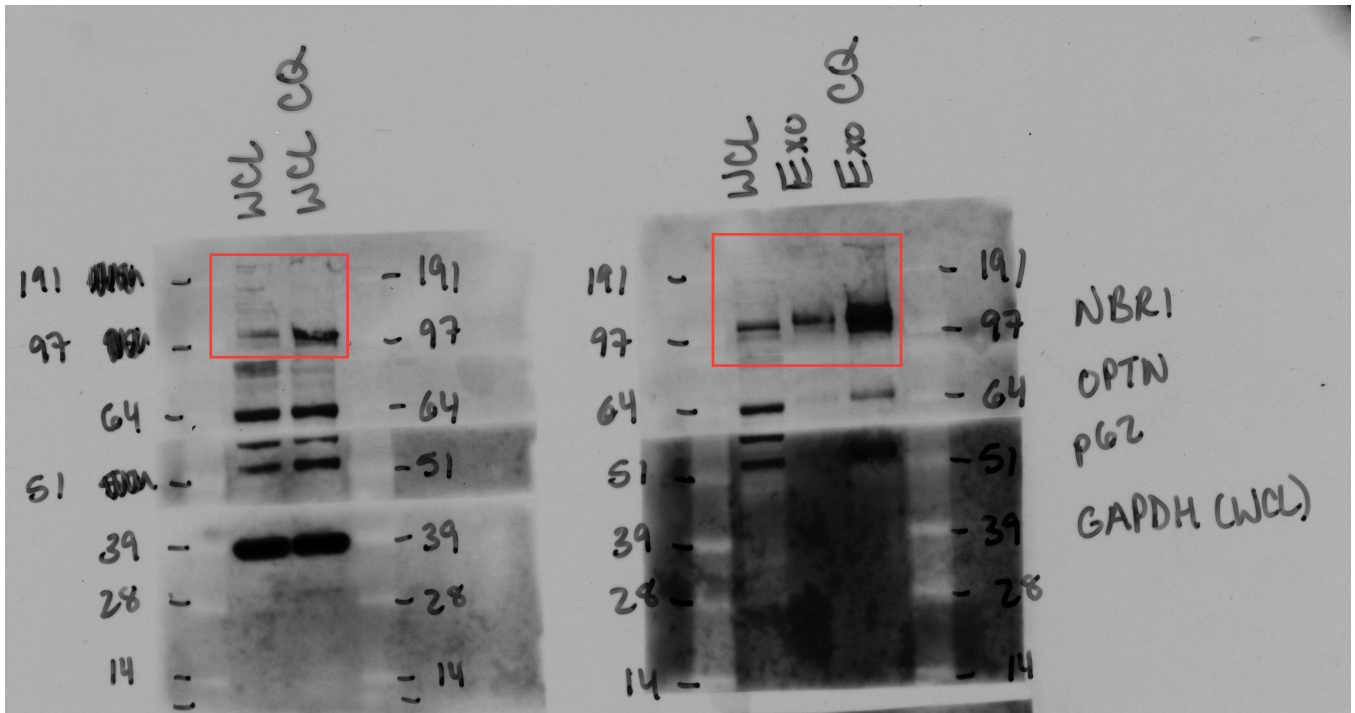

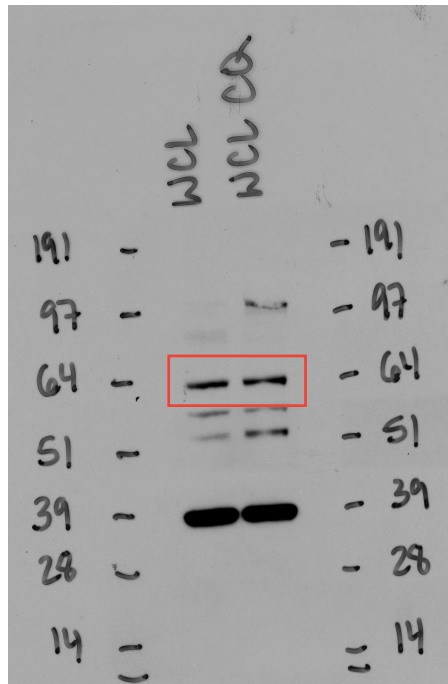

OPTN -  
WCL

Panel C

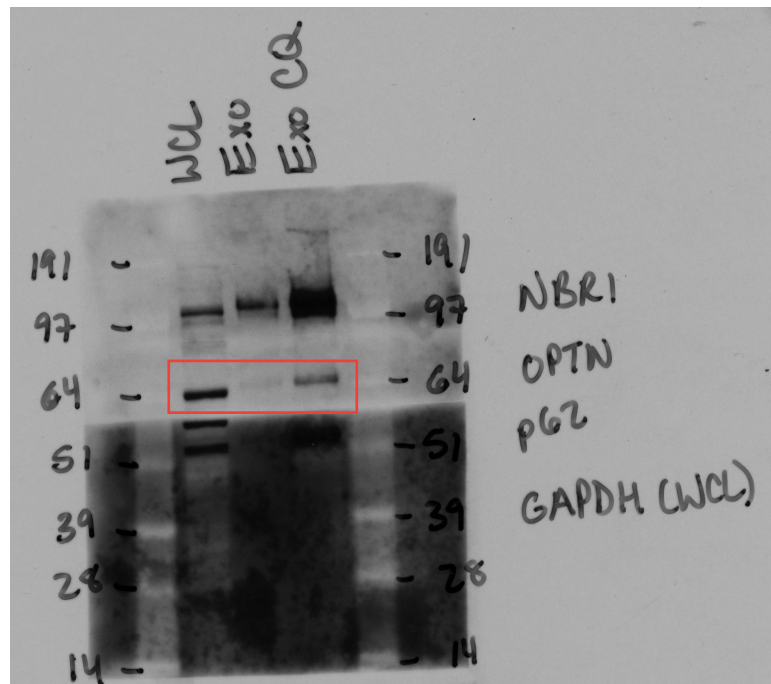

OPTN -  
EVPs (100K)

Panel C

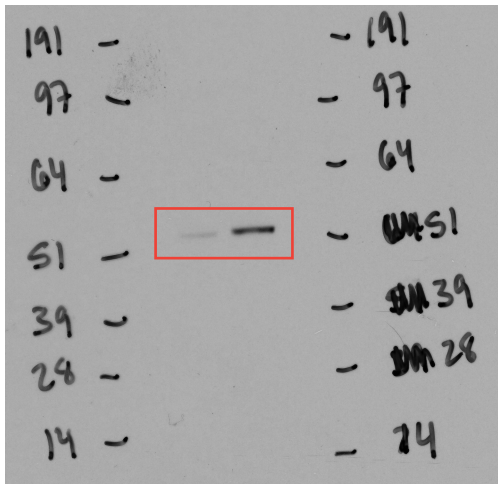

NDP52 -  
WCL

Panel C

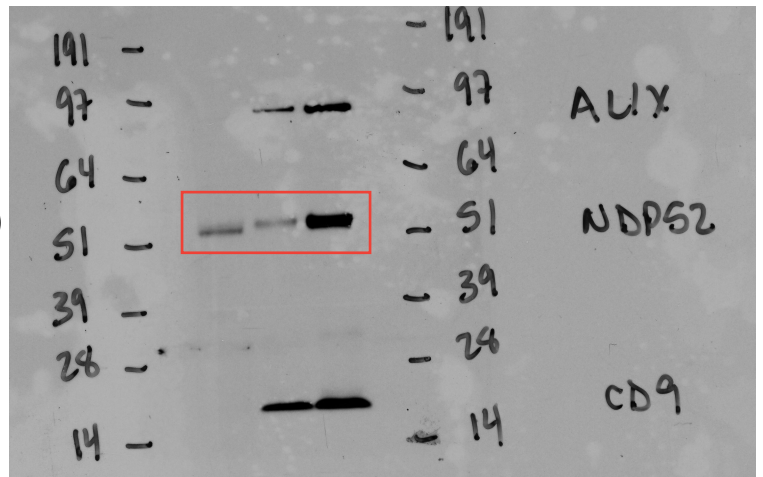

NDP52 -  
EVPs (100K)

Panel C

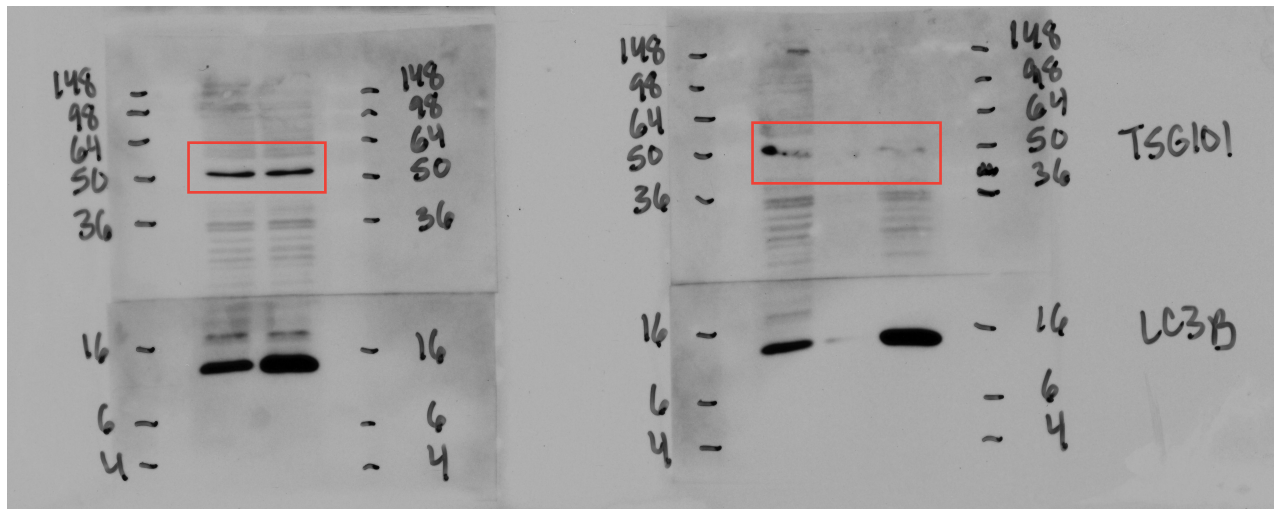

TSG101 -  
WCL and  
EVPs (100K)

Panel C

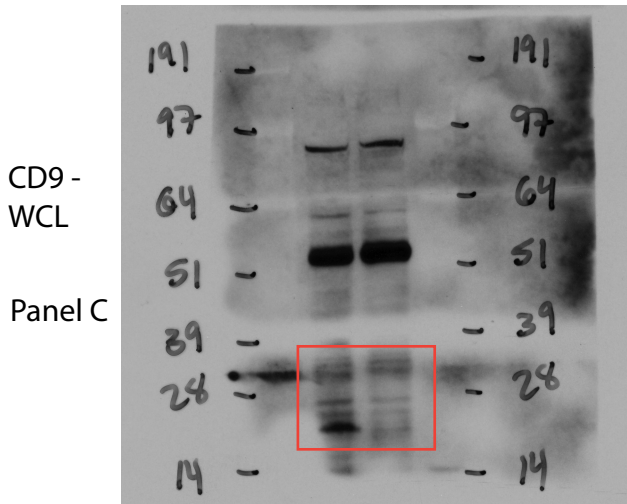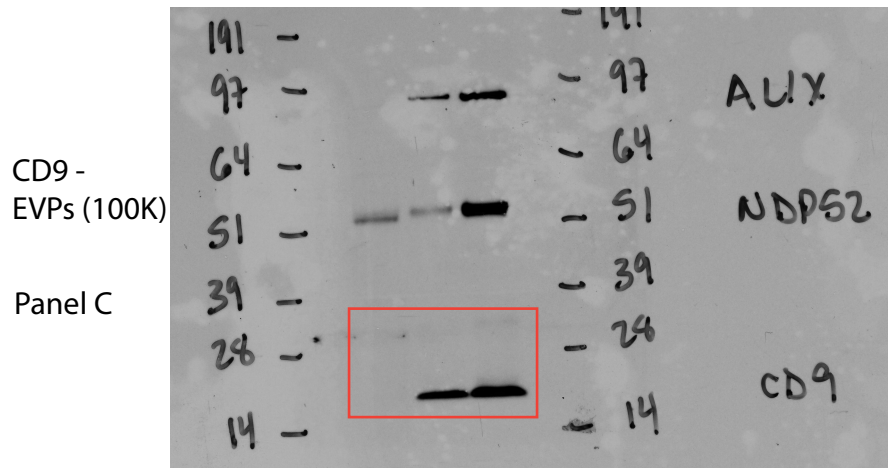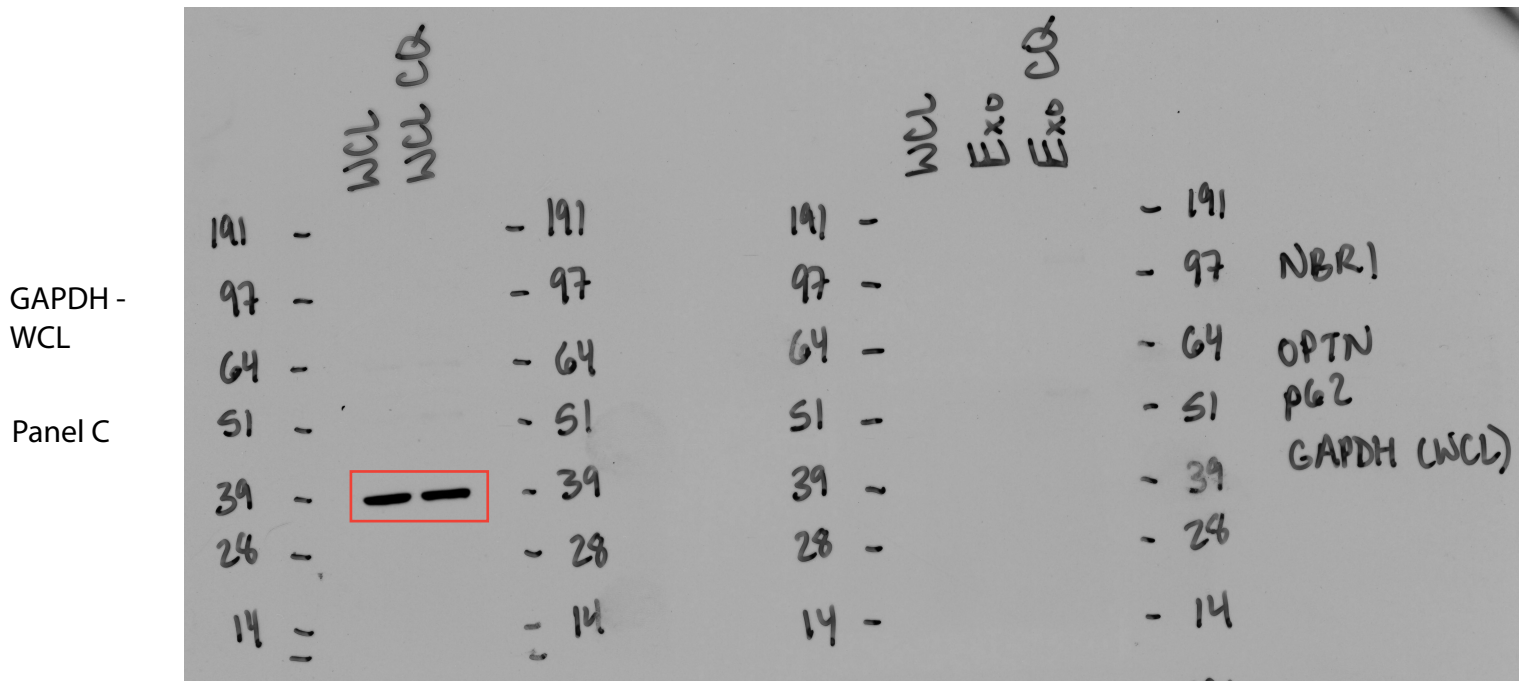

GFP-LC3 -  
Plasma  
EVPs

Panel E

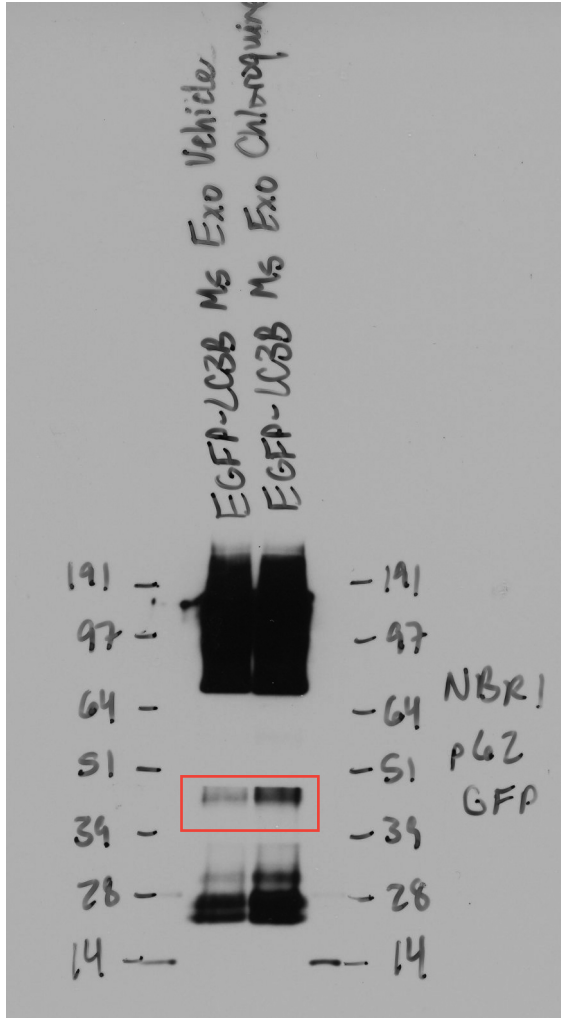

p62 -  
Plasma  
EVPs

Panel E

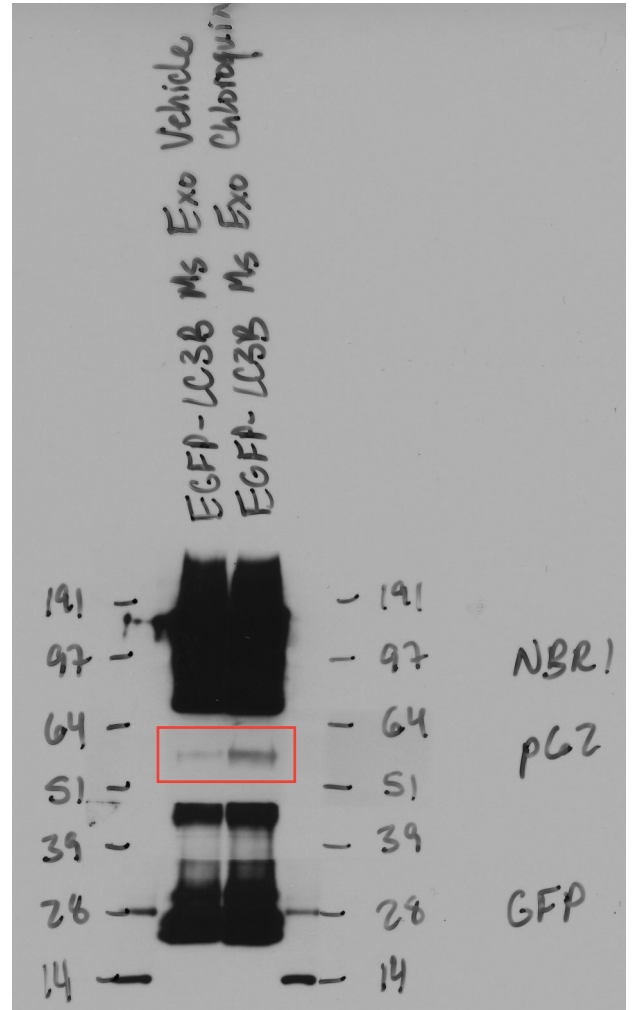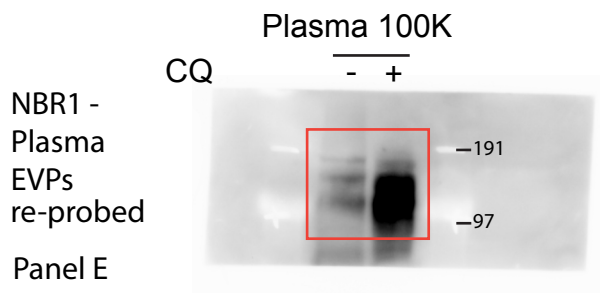

Supplement: JCB_202110151_SourceDataF3.pdf [file JCB_202110151_SourceDataF3.pdf]
