# Supplementary material for: Secretory autophagy maintains proteostasis upon lysosome inhibition
Source: PubMed Central journal article supplement — J Cell Biol. 2022 Apr 21;221(6):e202110151. doi: 10.1083/jcb.202110151 (PMC9036093; doi:10.1083/jcb.202110151), 2022-04-21

SNAP29 -  
WCL

Panel A

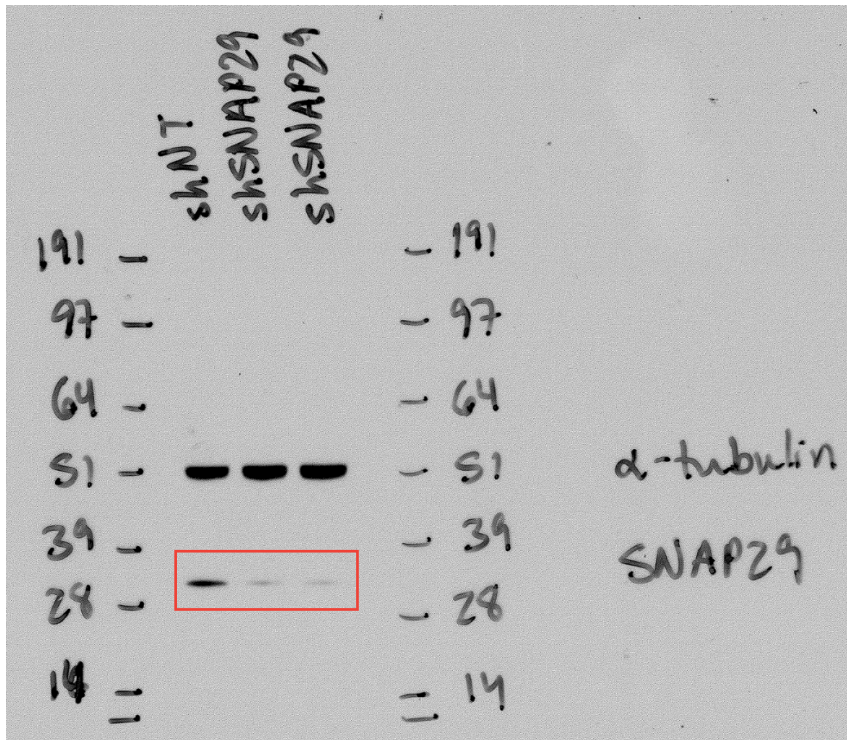

tubulin -  
WCL

Panel A

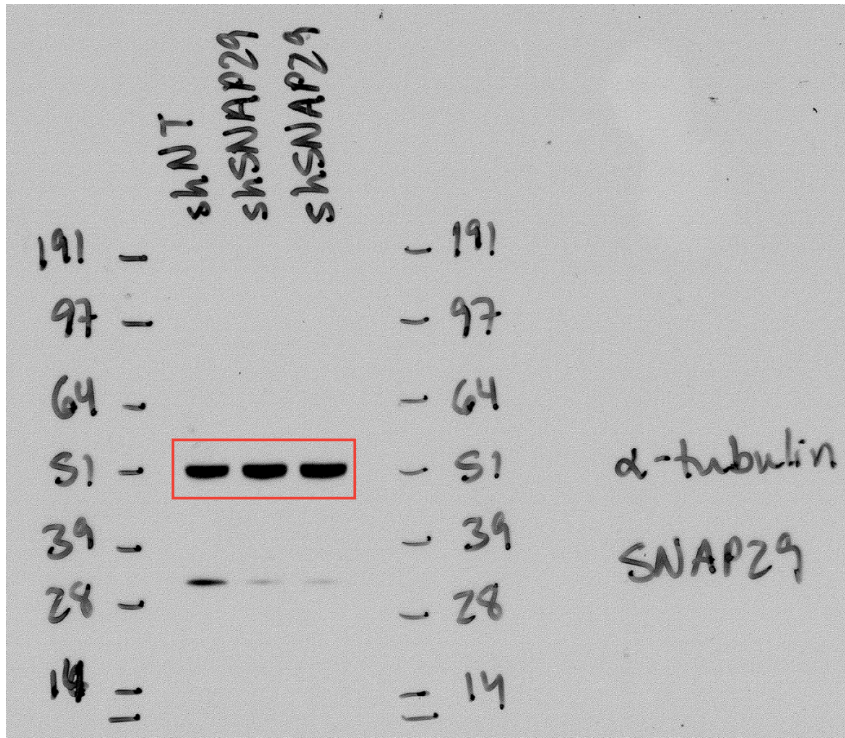

VAMP8 -  
WCL

Panel B

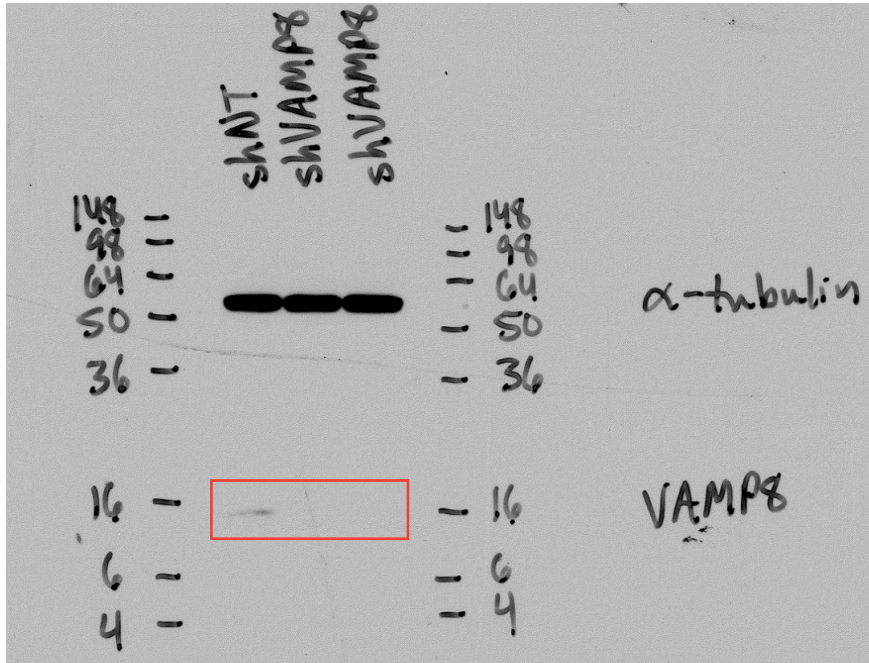

tubulin -  
WCL

Panel B

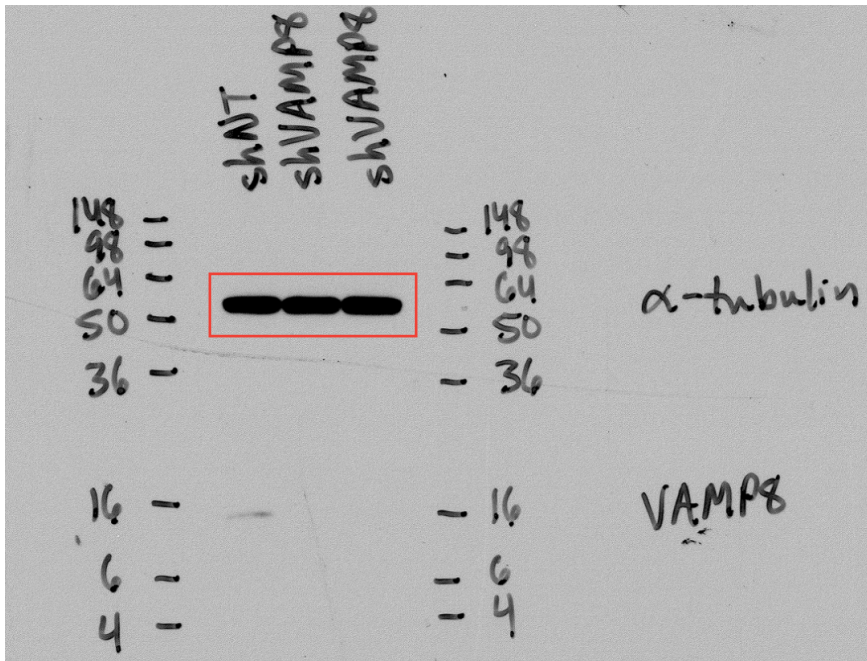

LC3 -  
WCL and  
EVPs (100K)

Panel E

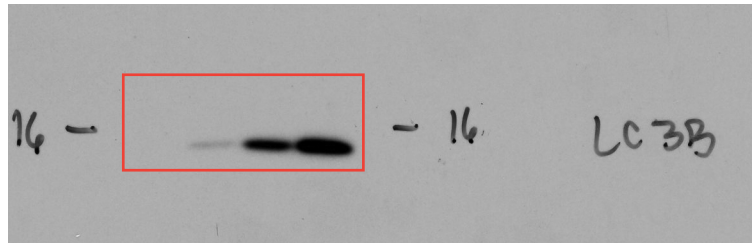

p62 -  
WCL and  
EVPs (100K)

Panel E

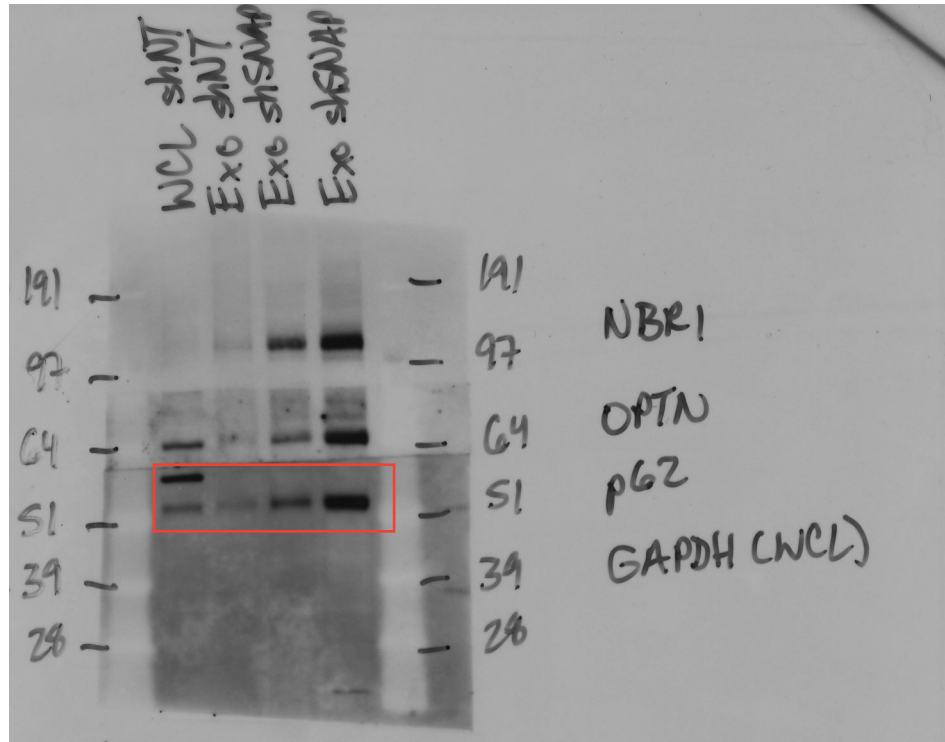

NBR1 -  
WCL and  
EVPs (100K)

Panel E

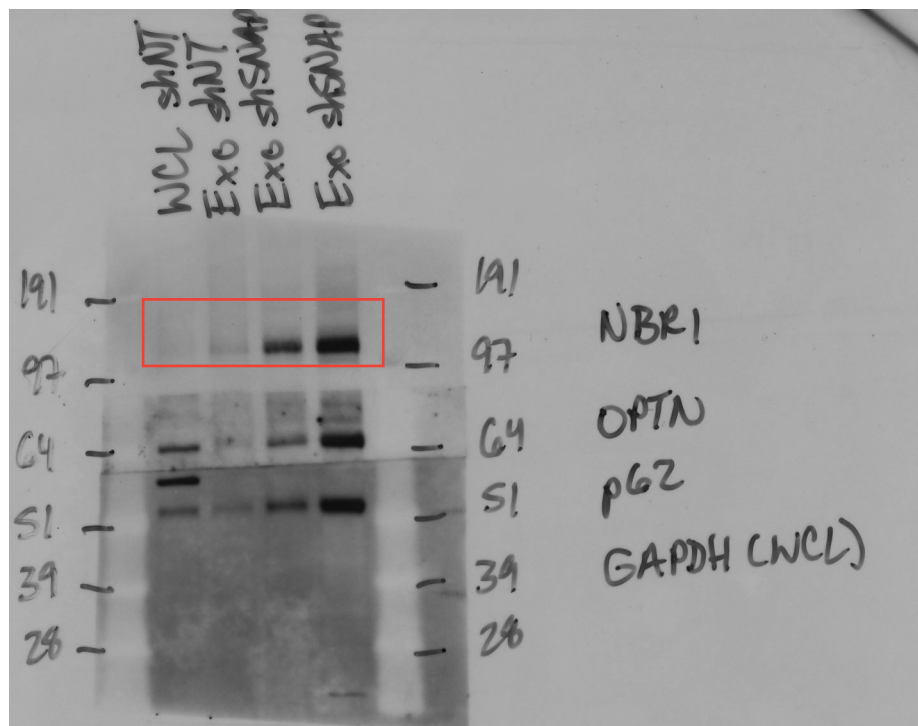

OPTN -  
WCL and  
EVPs (100K)

Panel E

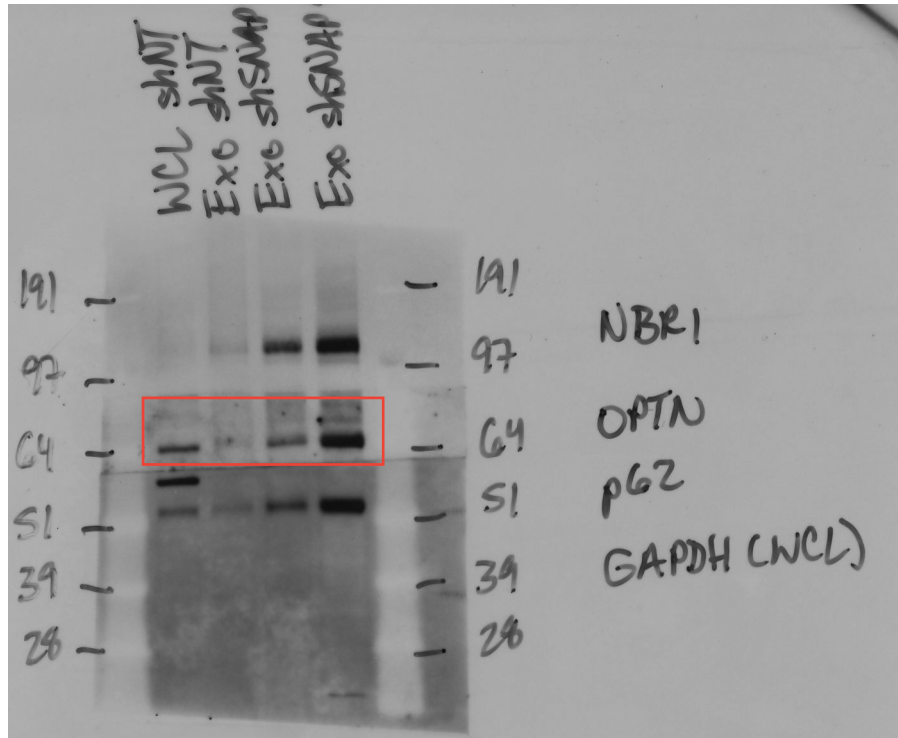

NDP52 -  
WCL and  
EVPs (100K)

Panel E

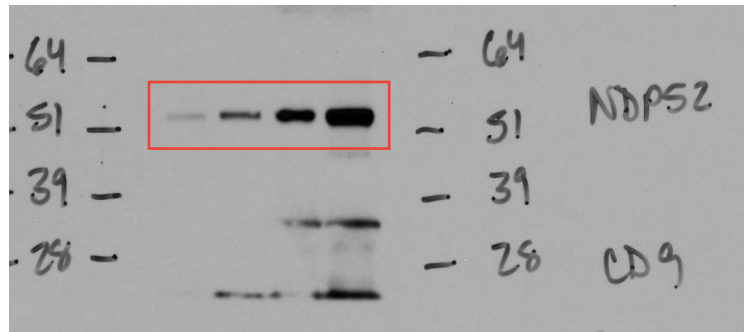

CD9 -  
WCL and  
EVPs (100K)

Panel E

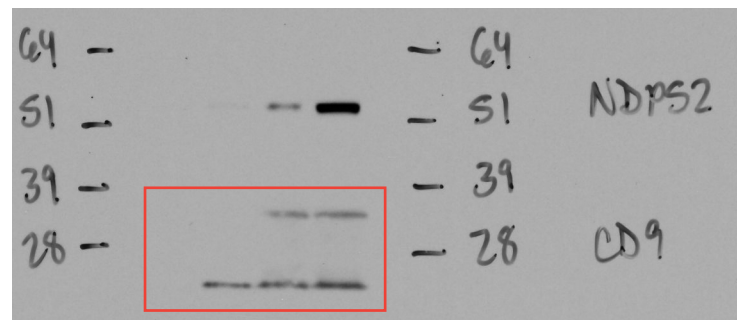

LC3 -  
WCL and  
EVPs (100K)

Panel G

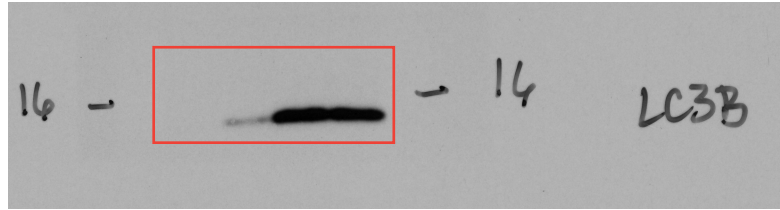

p62 -  
WCL and  
EVPs (100K)

Panel G

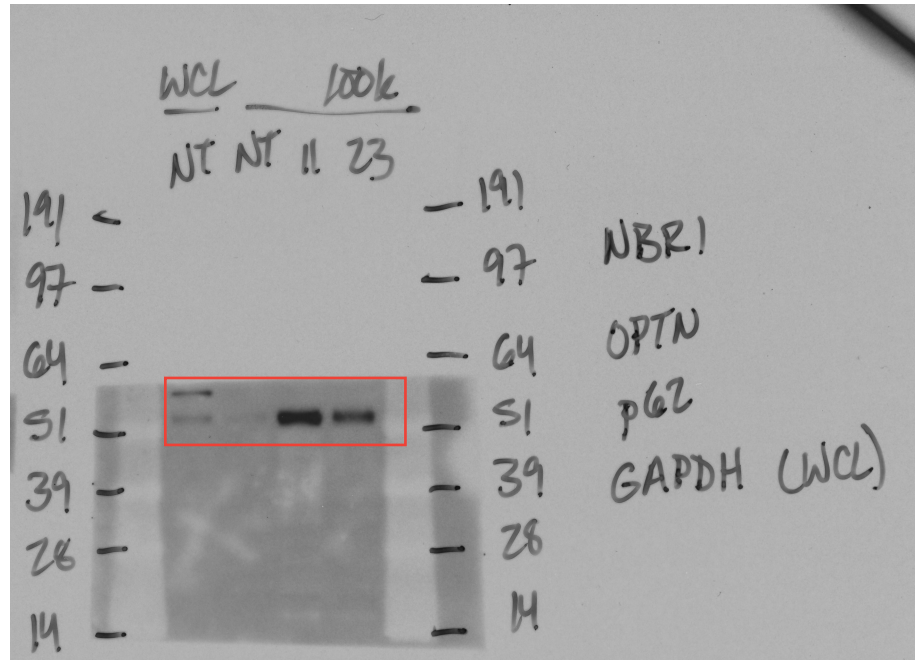

NBR1 -  
WCL and  
EVPs (100K)

Panel G

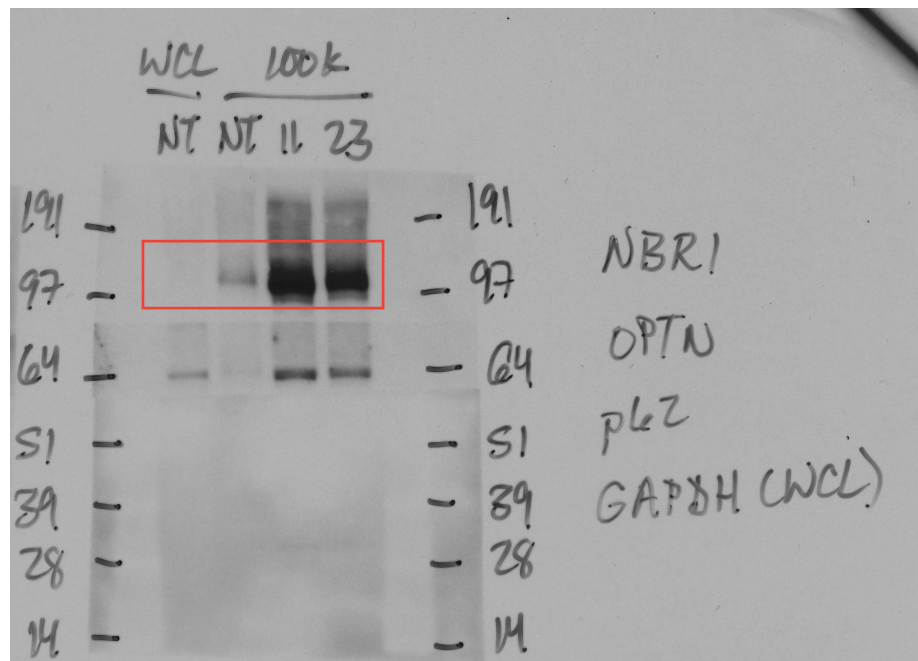

OPTN -  
WCL and  
EVPs (100K)

Panel G

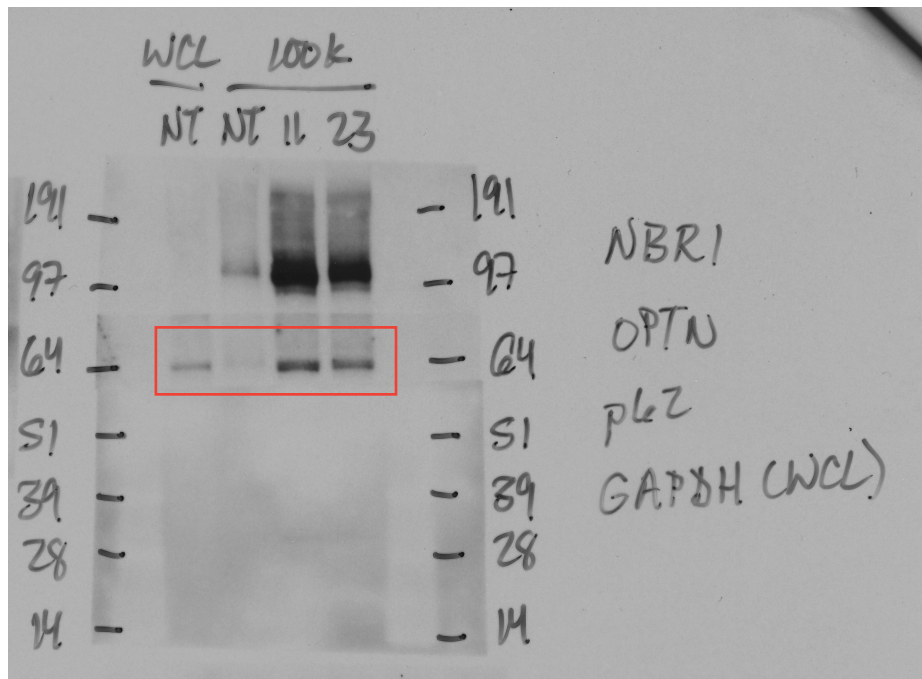

NDP52 -  
WCL and  
EVPs (100K)

Panel G

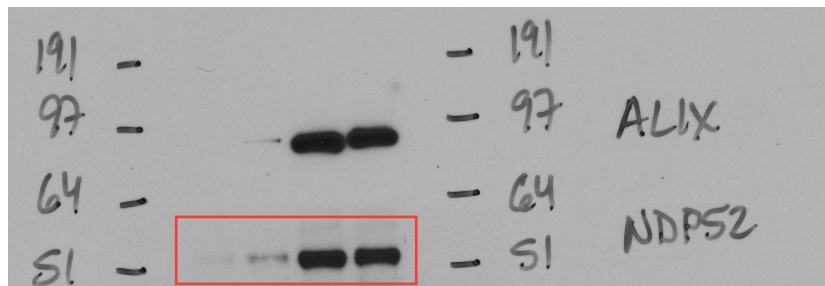

CD9 -  
WCL and  
EVPs (100K)

Panel G

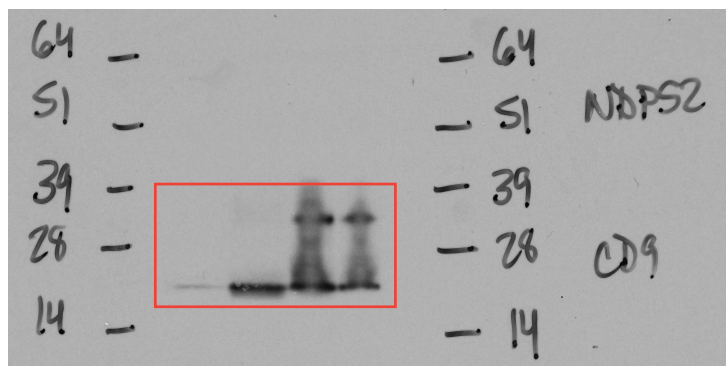

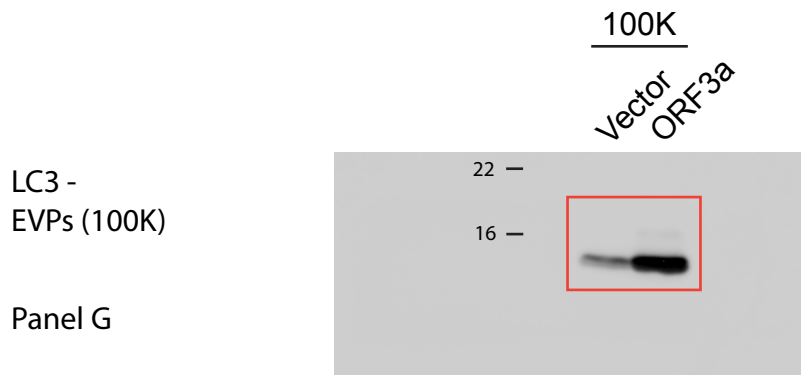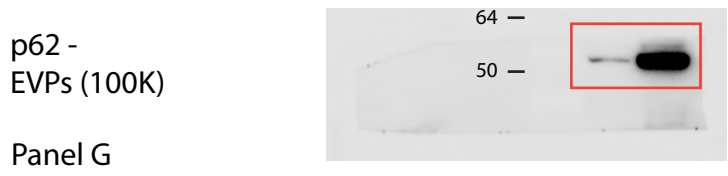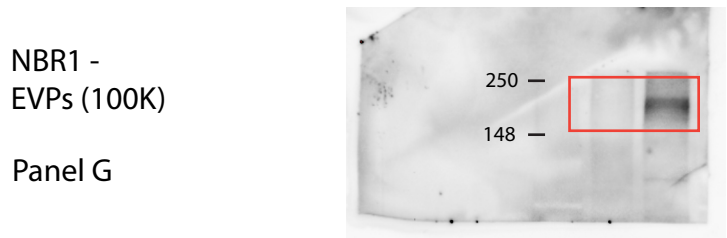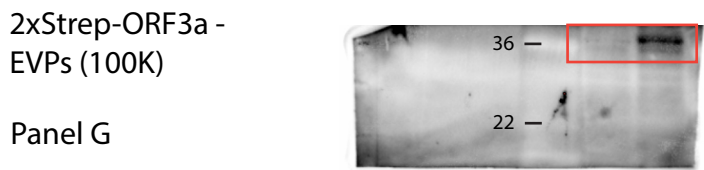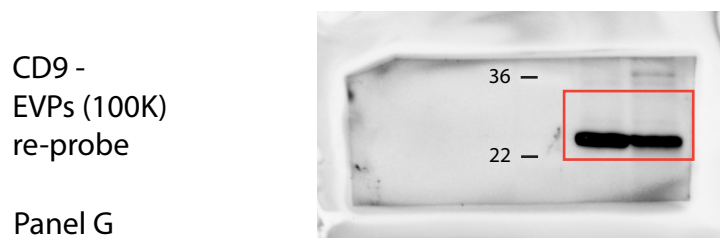

Supplement: JCB_202110151_SourceDataF6.pdf [file JCB_202110151_SourceDataF6.pdf]
