# Supplementary material for: Secretory autophagy maintains proteostasis upon lysosome inhibition
Source: PubMed Central journal article supplement — J Cell Biol. 2022 Apr 21;221(6):e202110151. doi: 10.1083/jcb.202110151 (PMC9036093; doi:10.1083/jcb.202110151), 2022-04-21

LC3 -  
WCL and  
EVPs (100K)

Panel A

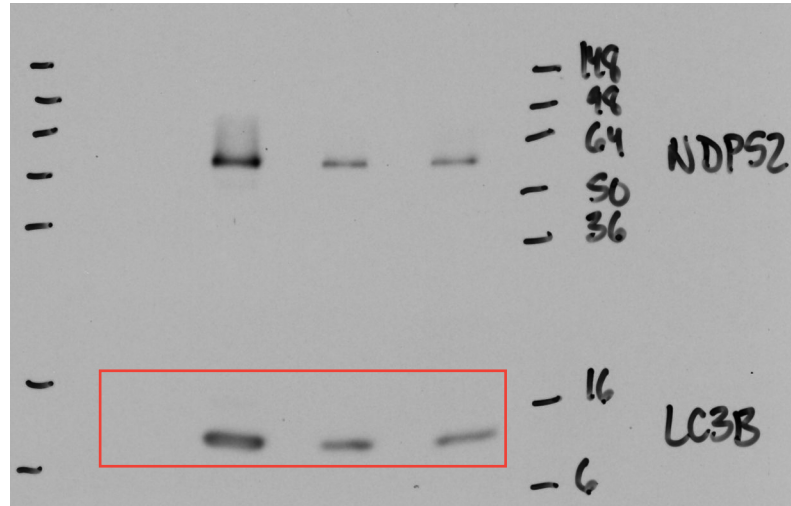

p62 -  
WCL and  
EVPs (100K)

Panel A

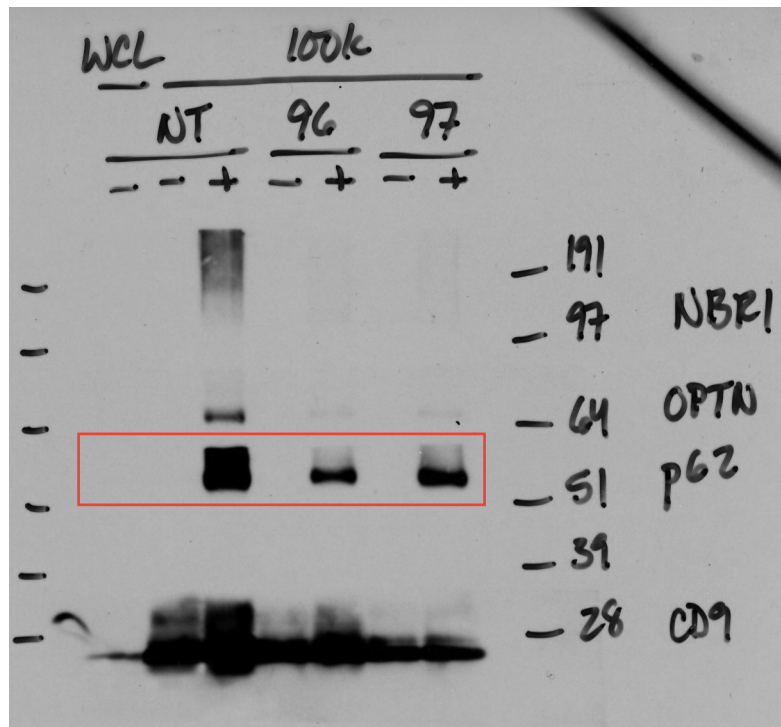

NBR1 -  
WCL and  
EVPs (100K)

Panel A

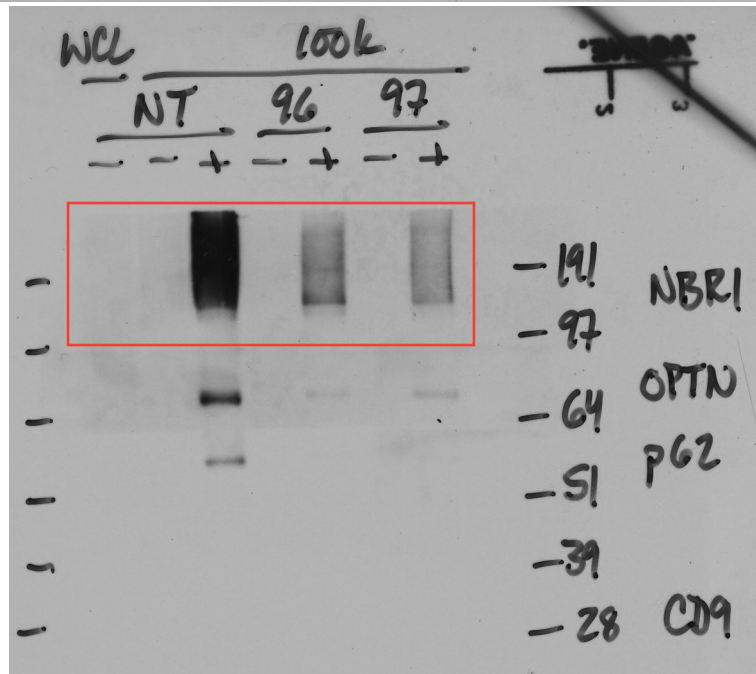

OPTN -  
WCL and  
EVPs (100K)

Panel A

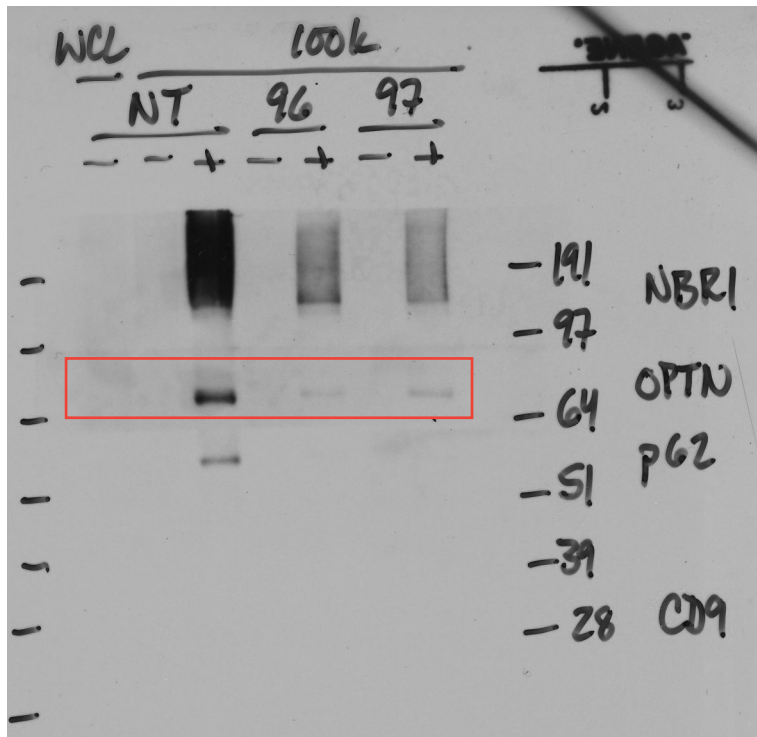

NDP52 -  
WCL and  
EVPs (100K)

Panel A

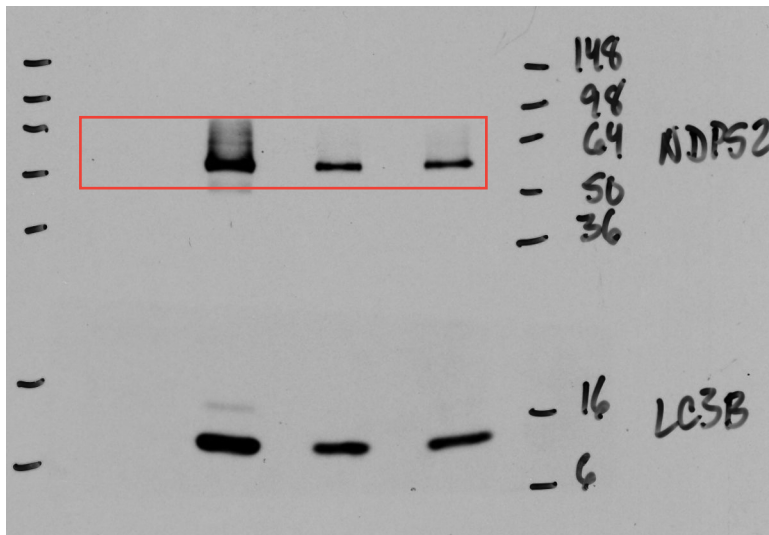

CD9 -  
WCL and  
EVPs (100K)

Panel A

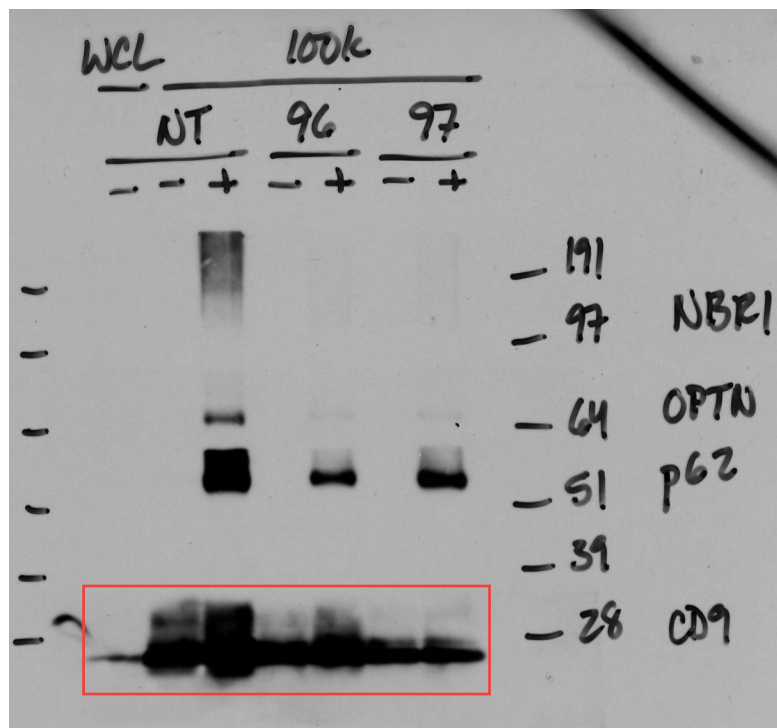

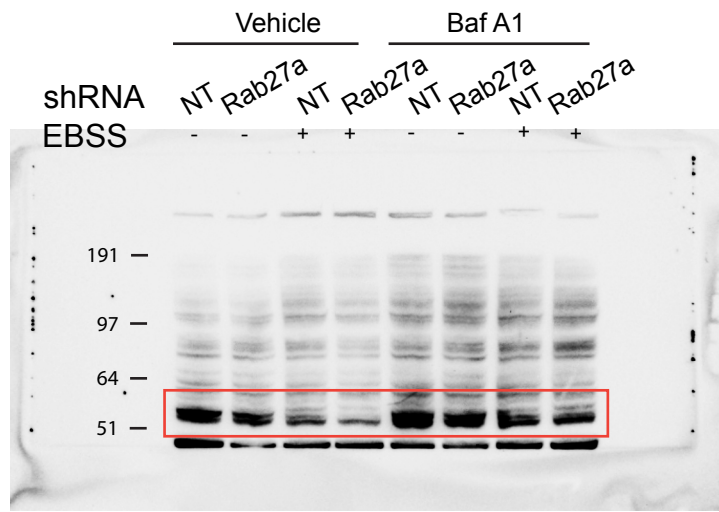

LC3 -  
WCL  
Panel C

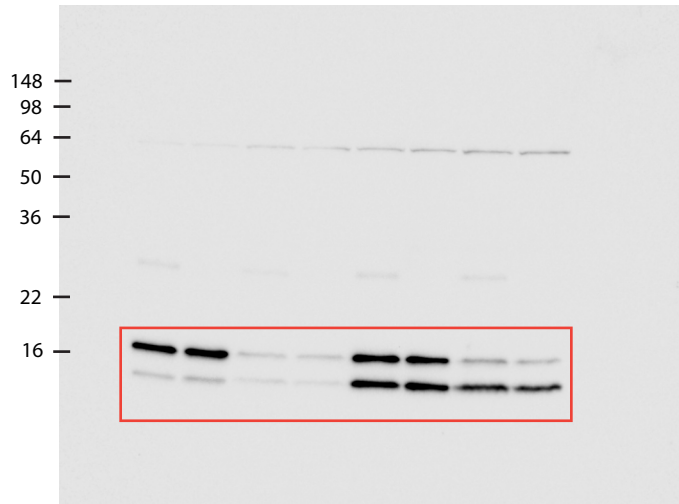

Rab27a -  
WCL  
Panel C

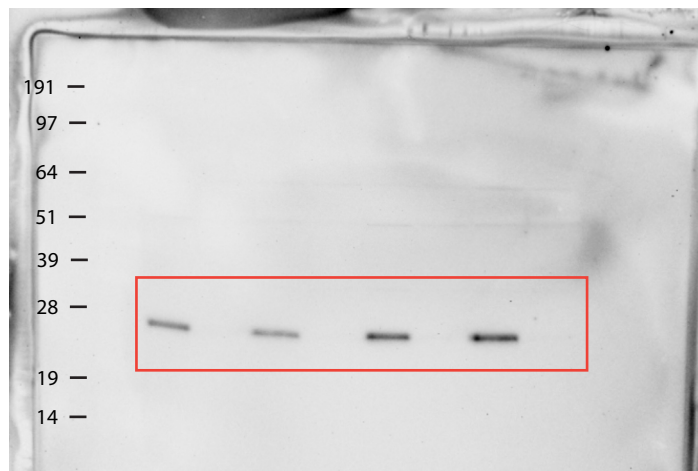

GAPDH -  
WCL  
Panel C

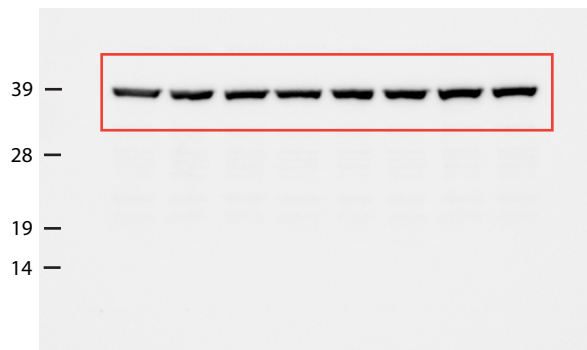

LC3 - Panel D  
WCL

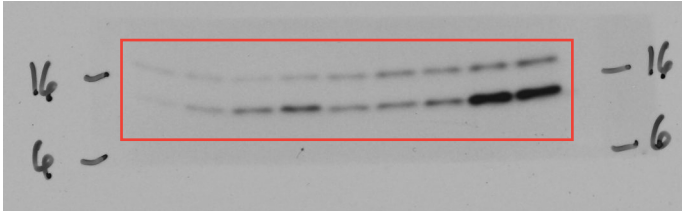

LC3 - Panel D  
EVPs

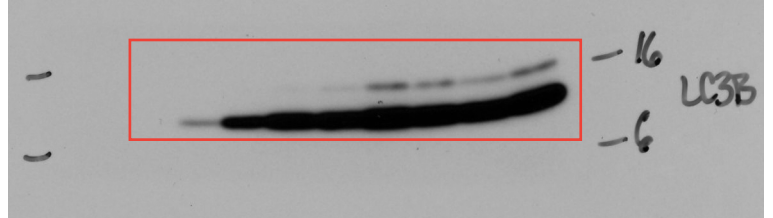

p62 - Panel D  
WCL

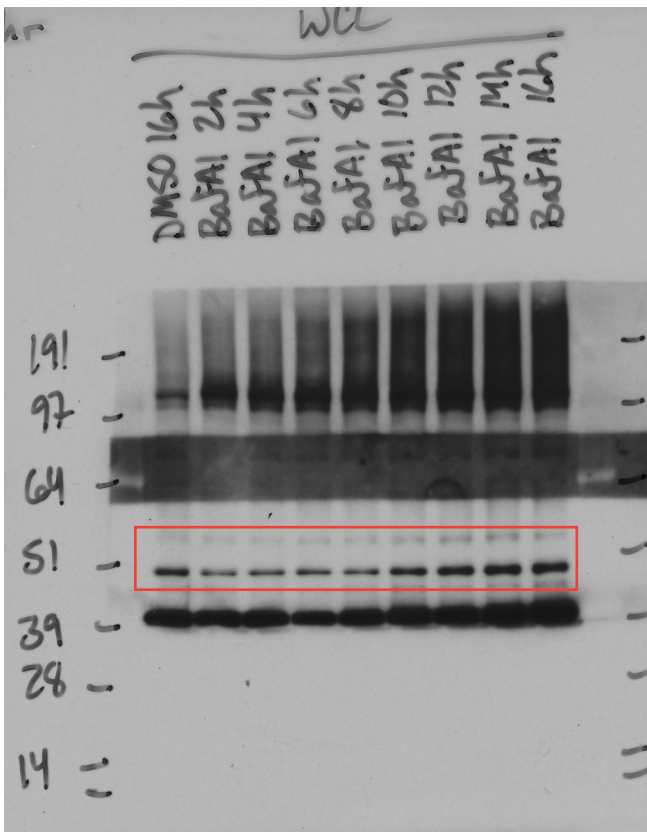

p62 - Panel D  
EVPs

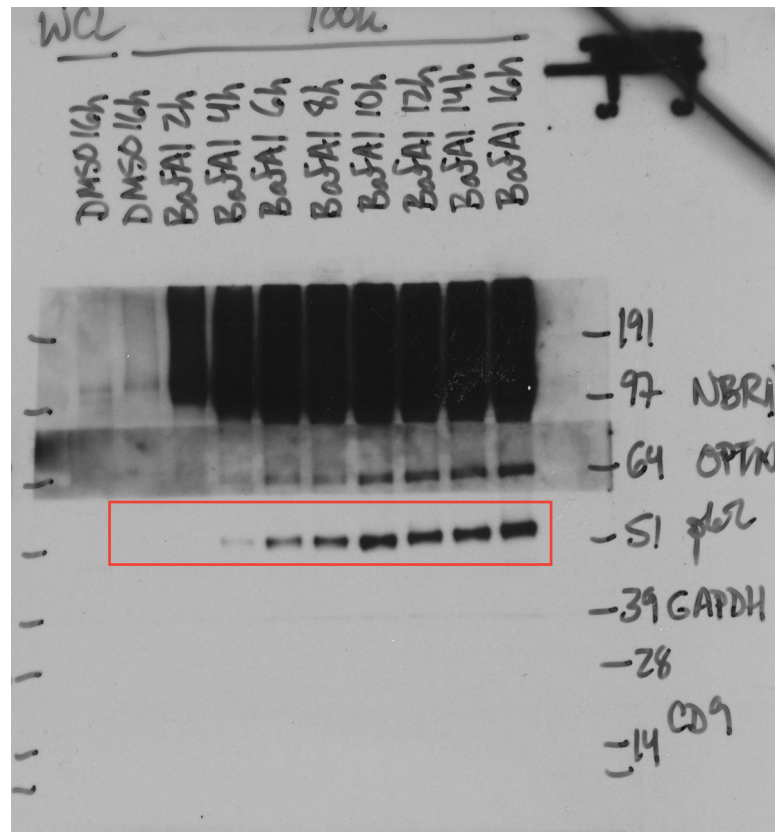

NBR1-  
WCL Panel D

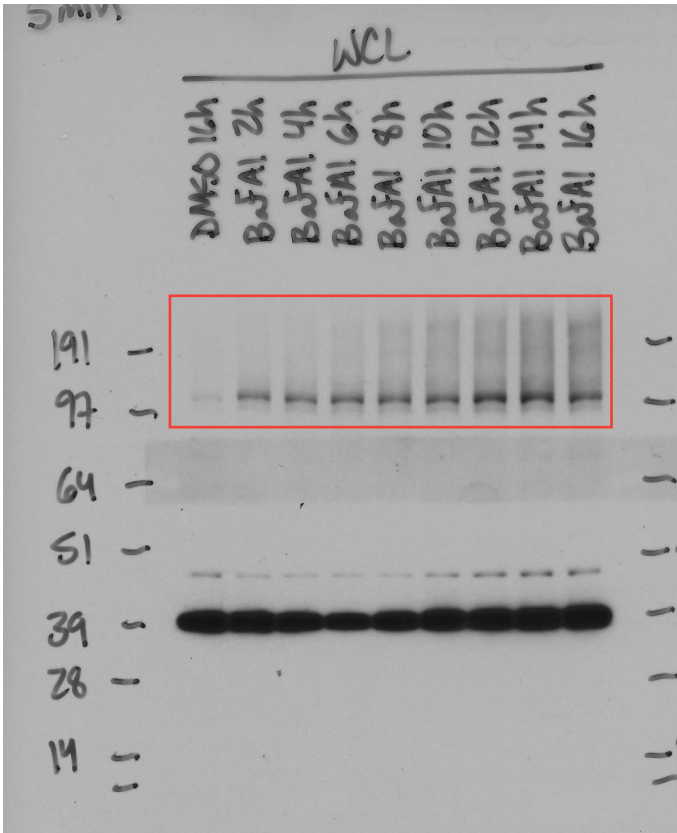

NBR1-  
EVPs Panel D

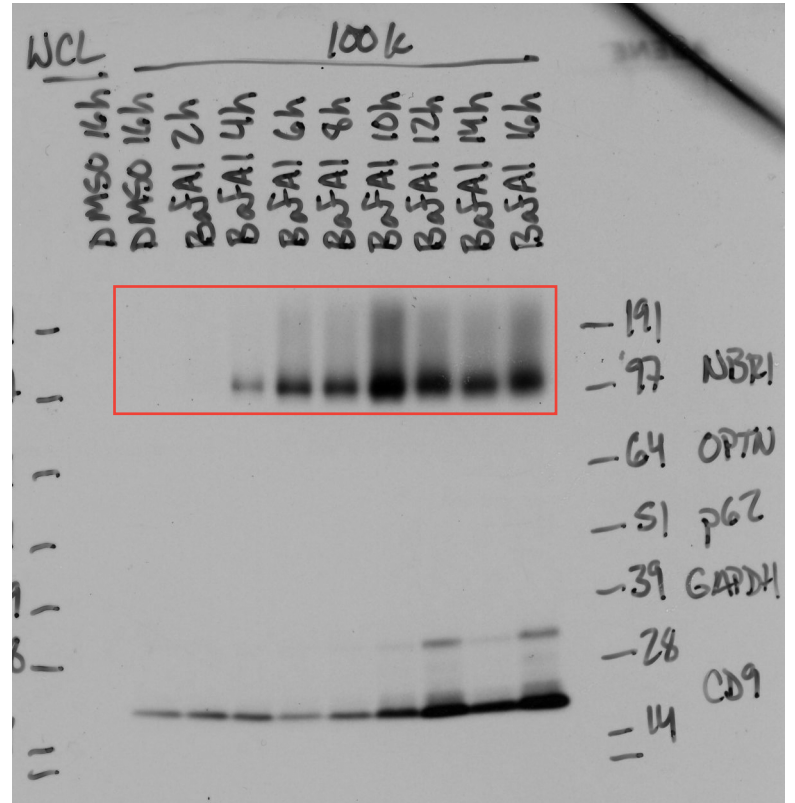

OPTN-  
WCL Panel D

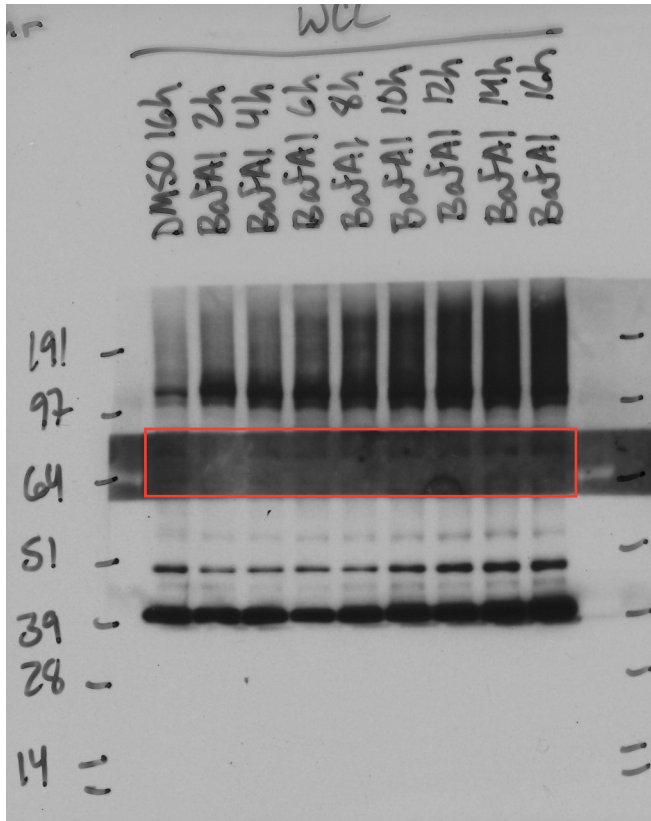

OPTN1-  
EVPs Panel D

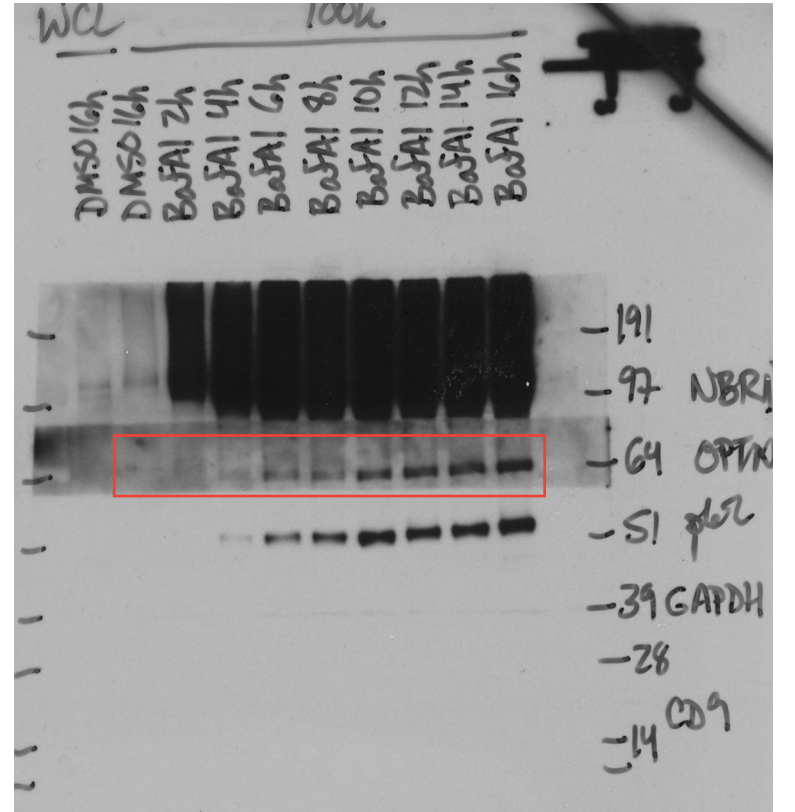

NDP52 - Panel D  
WCL

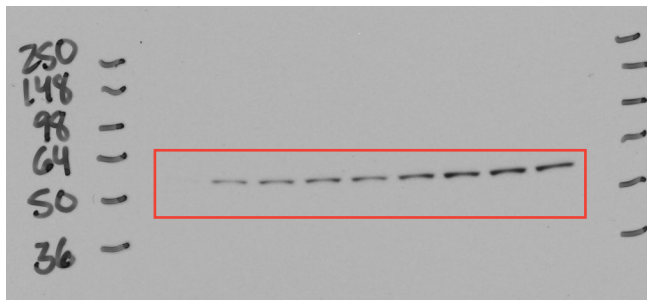

NDP52 - Panel D  
EVPs

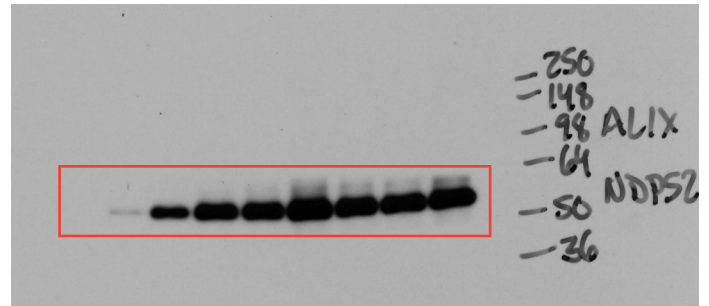

GAPDH -  
WCL

Panel D

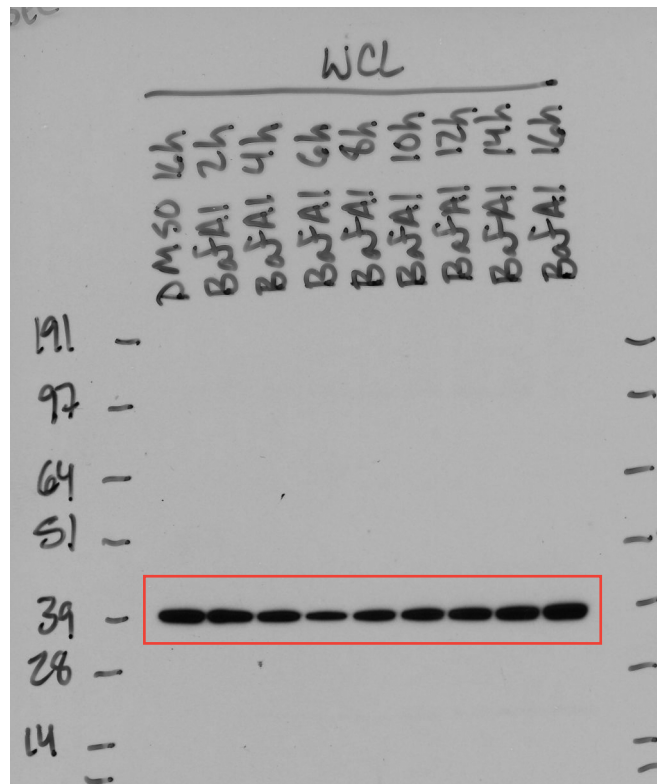

WCL

| shRNA | NT | ATG3 | NT   | S29 | S29  | ATG3 |
|-------|----|------|------|-----|------|------|
| shRNA | NT | NT   | R27a | NT  | R27a | R27a |

LC3-  
WCL

Panel F

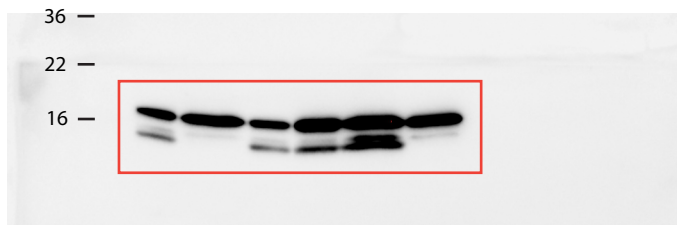

WCL

| shRNA | NT | ATG3 | NT   | S29 | S29  | ATG3 |
|-------|----|------|------|-----|------|------|
| shRNA | NT | NT   | R27a | NT  | R27a | R27a |

p62-  
WCL

Panel F

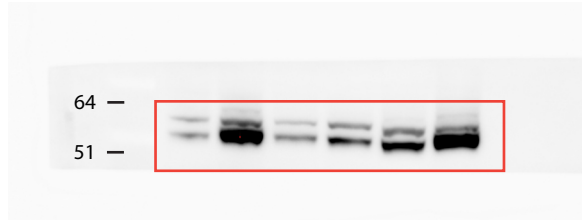

NBR1-  
WCL

Panel F

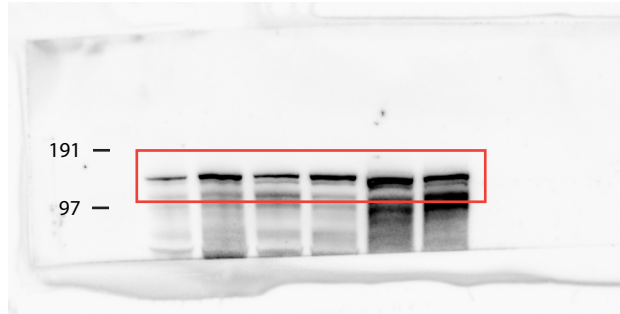

SNAP29 -  
WCL

Panel F

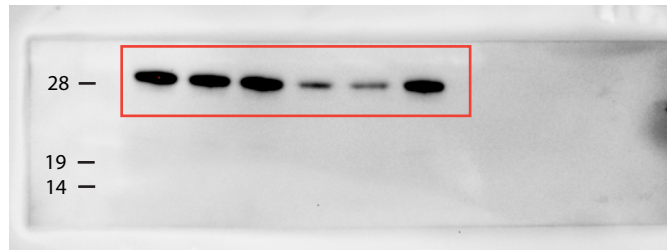

Rab27a -  
WCL

Panel F

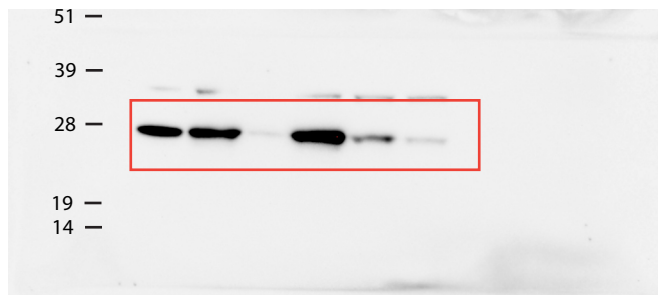

ATG3 -  
WCL

Panel F

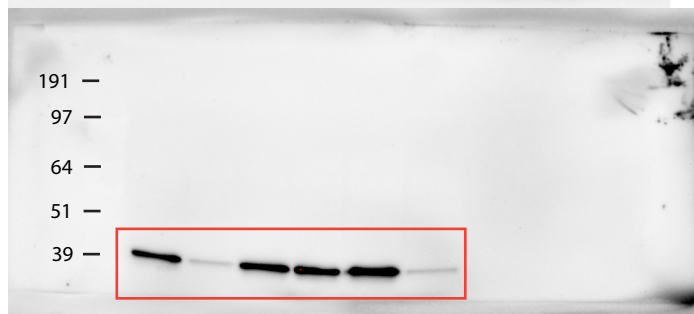

GAPDH -  
WCL

Panel F

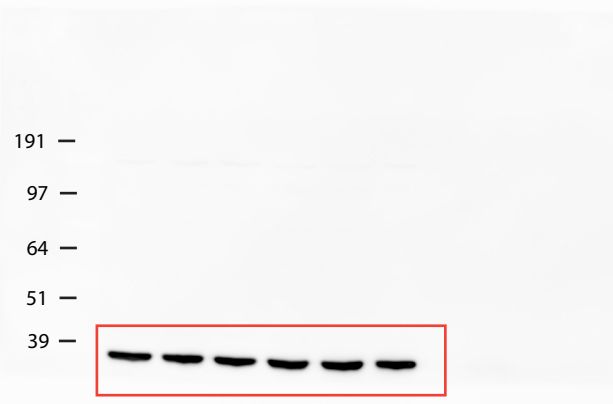

Supplement: JCB_202110151_SourceDataF7.pdf [file JCB_202110151_SourceDataF7.pdf]
