# Supplementary material for: Secretory autophagy maintains proteostasis upon lysosome inhibition
Source: PubMed Central journal article supplement — J Cell Biol. 2022 Apr 21;221(6):e202110151. doi: 10.1083/jcb.202110151 (PMC9036093; doi:10.1083/jcb.202110151), 2022-04-21

LAMP1 -  
WCL and  
EVPs (100K)  
Panel B

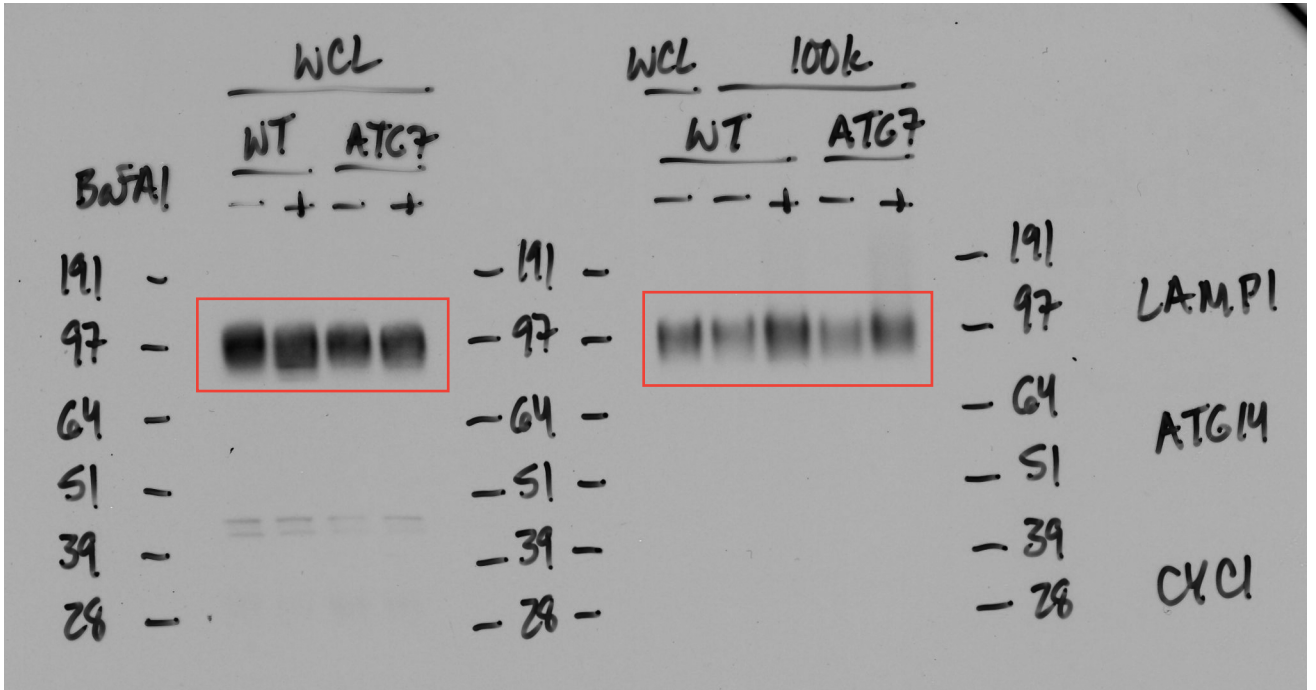

Rab7a -  
WCL and  
EVPs (100K)  
Panel B

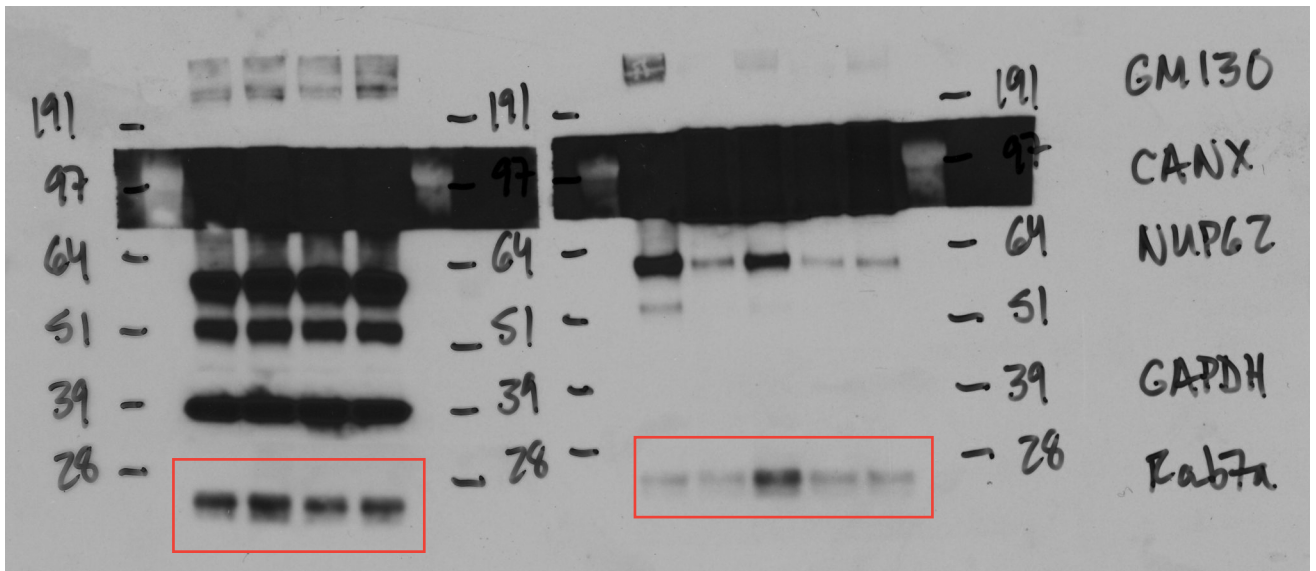

Rab5a -  
WCL and  
EVPs (100K)

Panel B

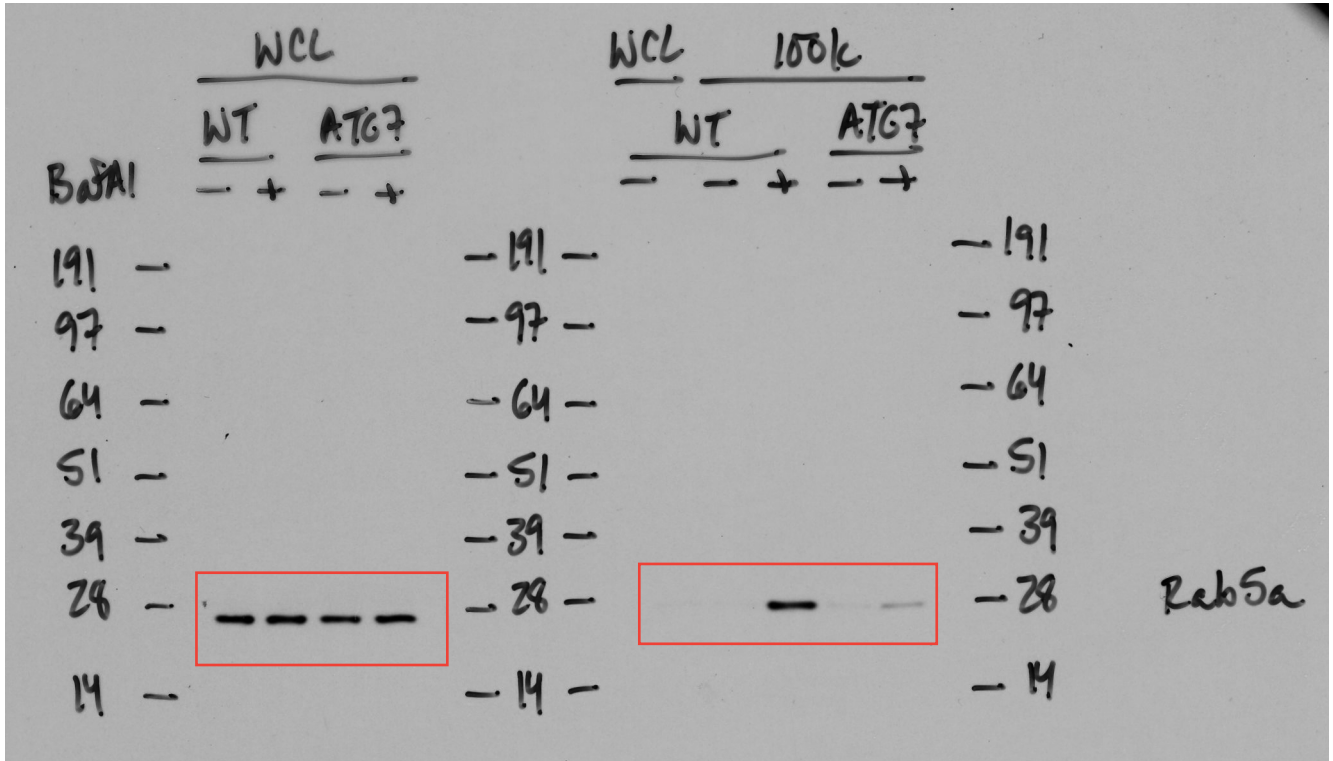

GM130 -  
WCL and  
EVPs (100K)

Panel B

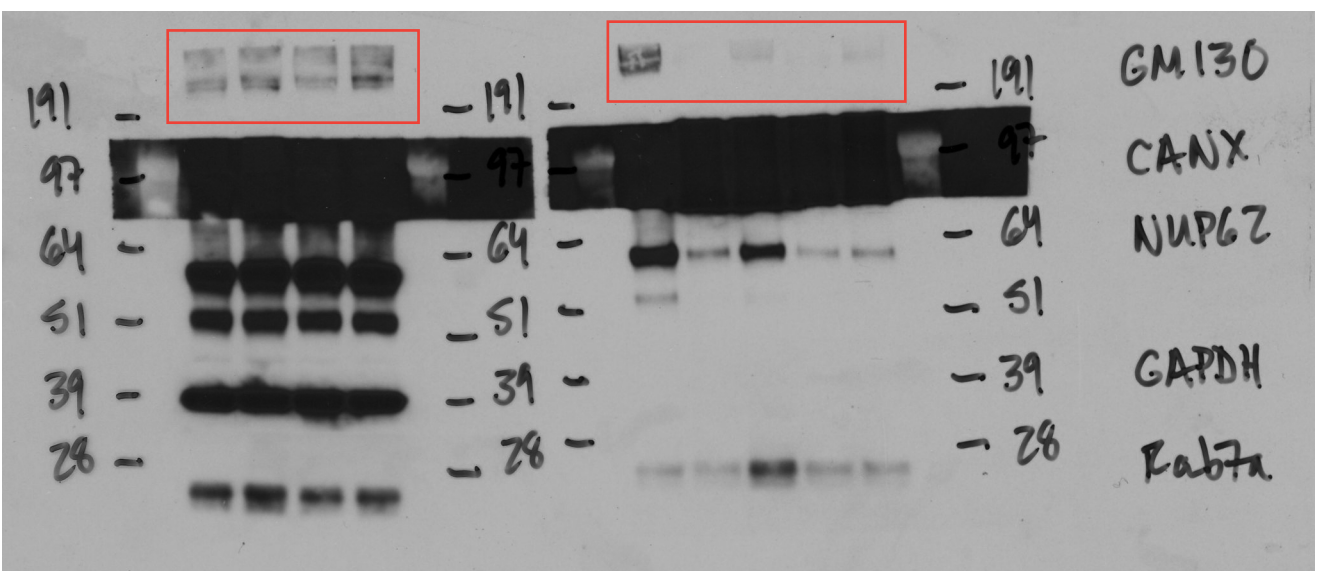

CYC1 -  
WCL and  
EVPs (100K)  
  
Panel B

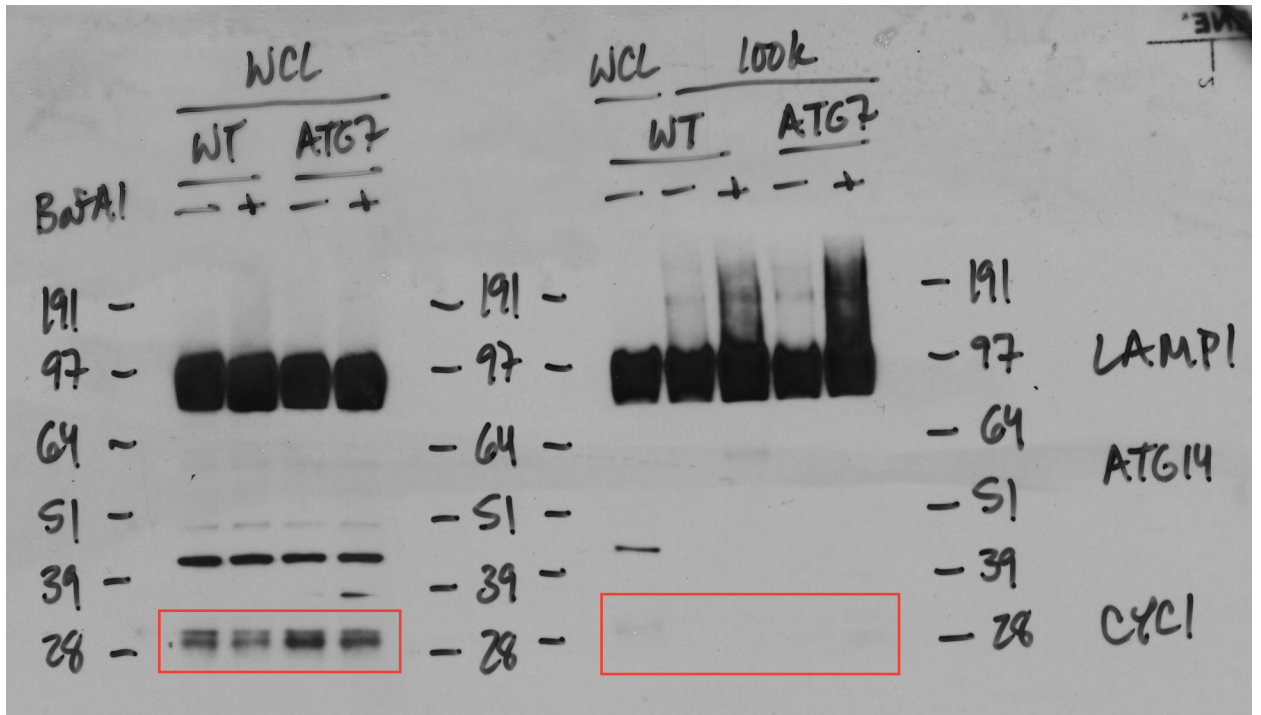

NUP62 -  
WCL and  
EVPs (100K)  
  
Panel B

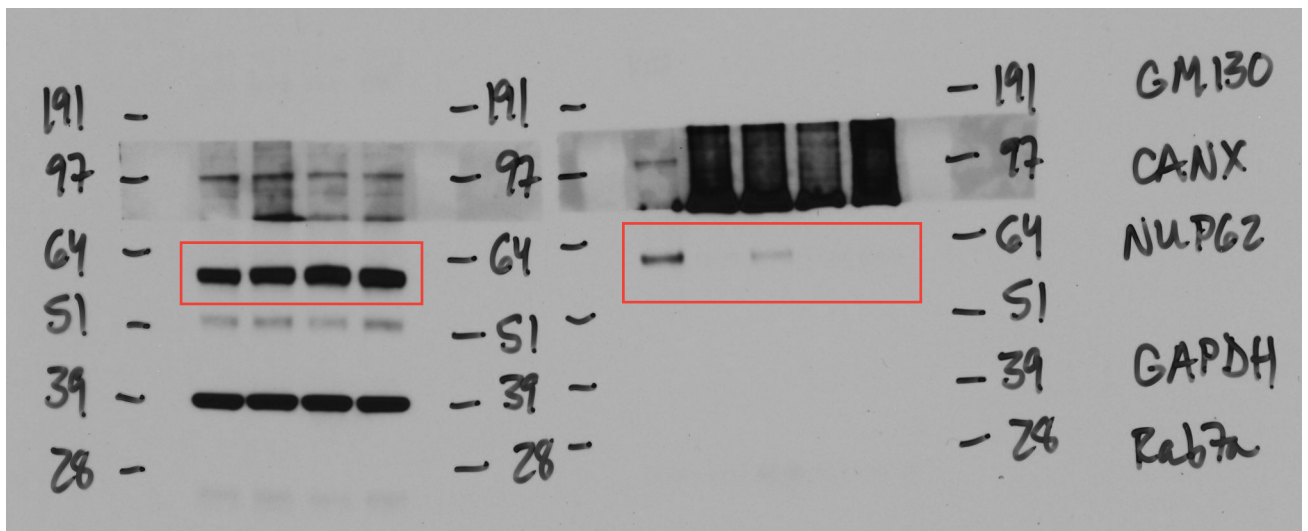

GAPDH -  
WCL

Panel B

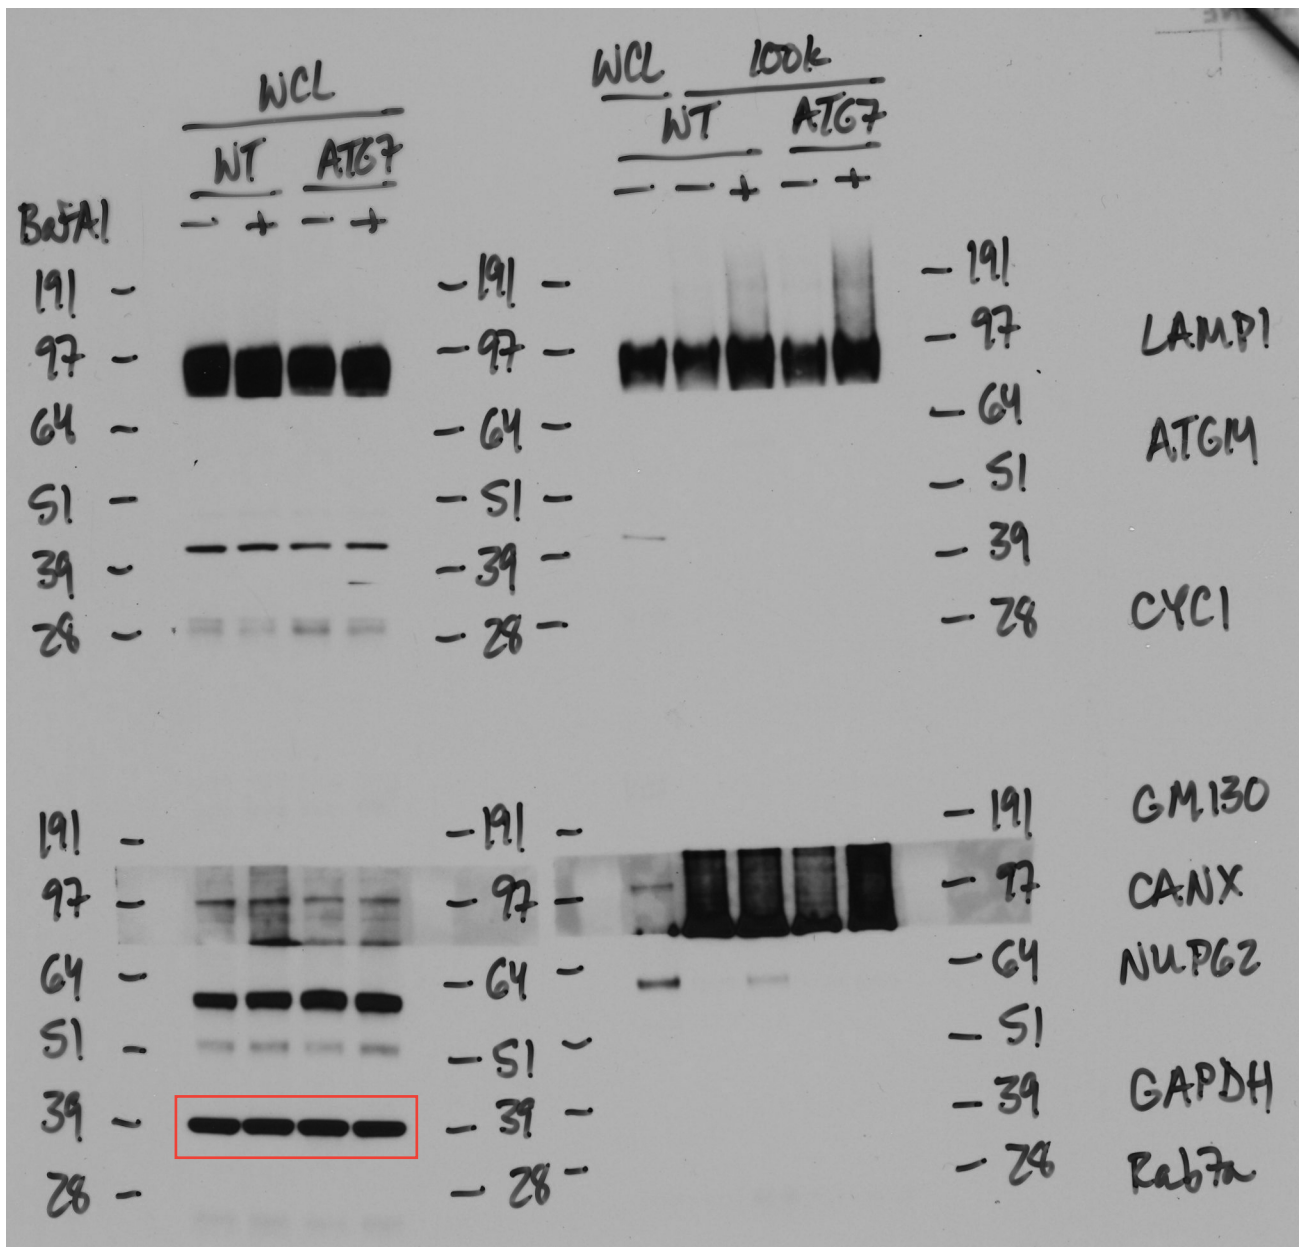

Supplement: JCB_202110151_SourceDataF1.pdf [file JCB_202110151_SourceDataF1.pdf]
