# Supplementary material for: Secretory autophagy maintains proteostasis upon lysosome inhibition
Source: PubMed Central journal article supplement — J Cell Biol. 2022 Apr 21;221(6):e202110151. doi: 10.1083/jcb.202110151 (PMC9036093; doi:10.1083/jcb.202110151), 2022-04-21

LC3 -  
WCL and  
EVPs (100K)  
in KOs

Panel A

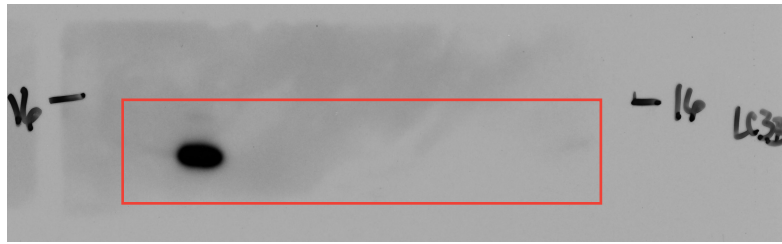

p62 -  
WCL and  
EVPs (100K)  
in KOs

Panel A

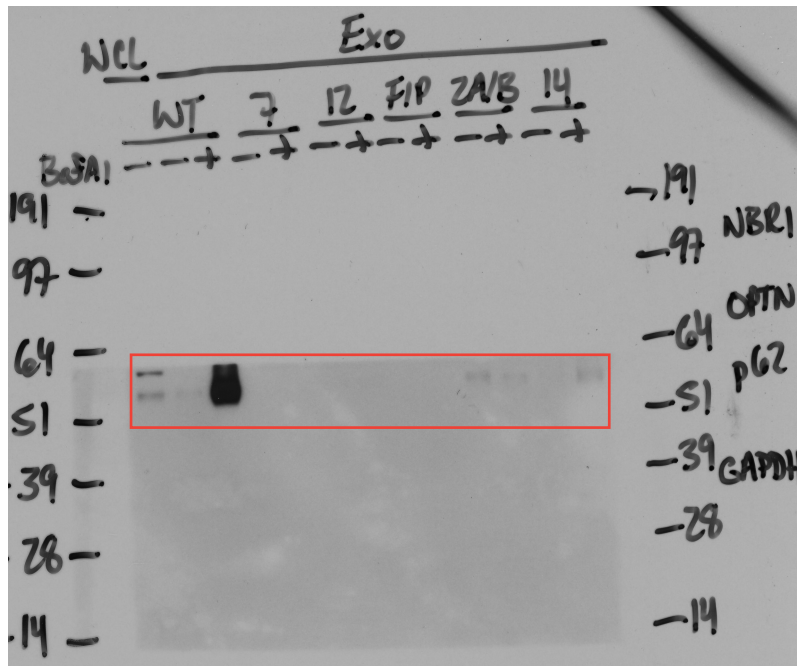

NBR1 -  
WCL and  
EVPs (100K)  
in KOs

Panel A

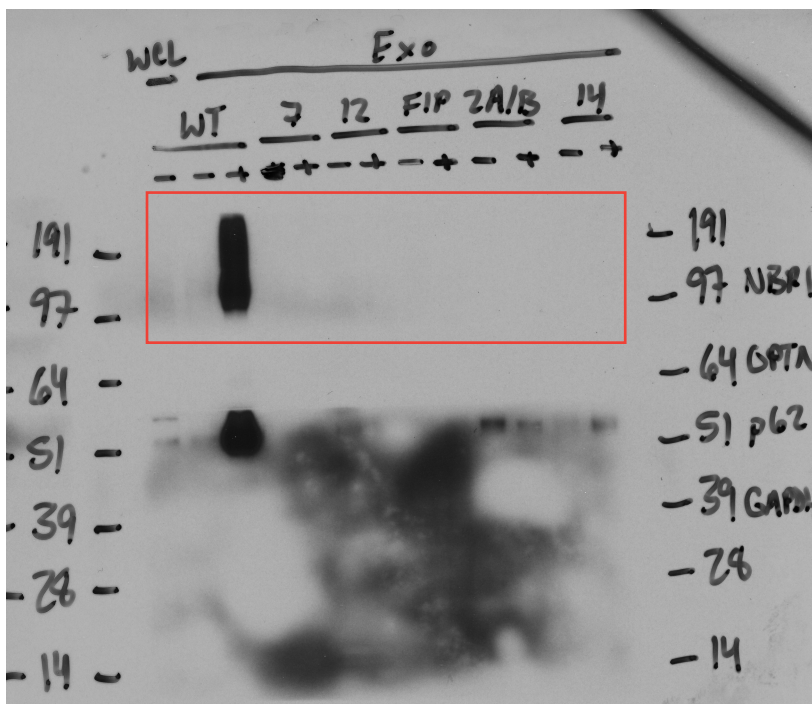

OPTN -  
WCL and  
EVPs (100K)  
in KOs  
Panel A

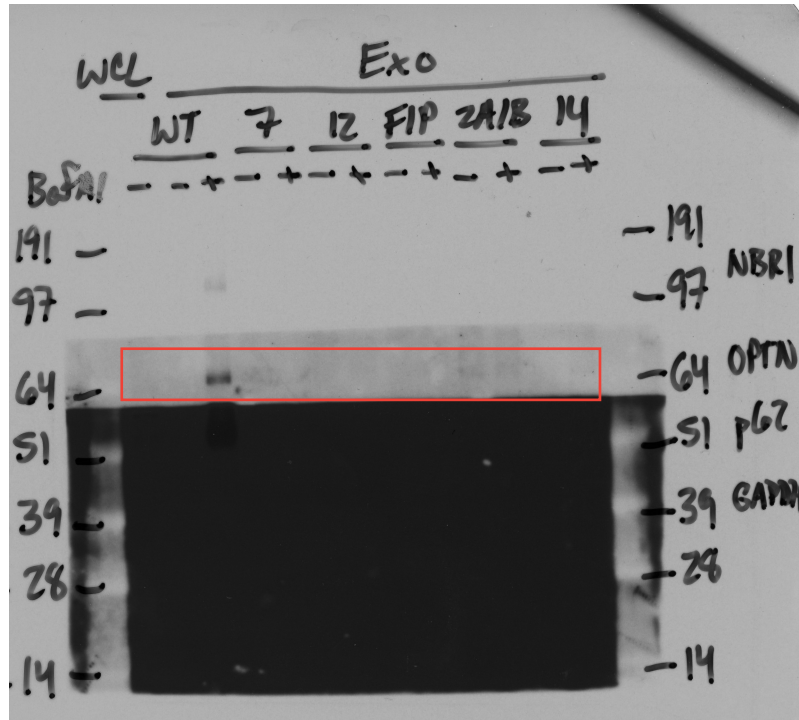

NDP52 -  
WCL and  
EVPs (100K)  
in KOs  
Panel A

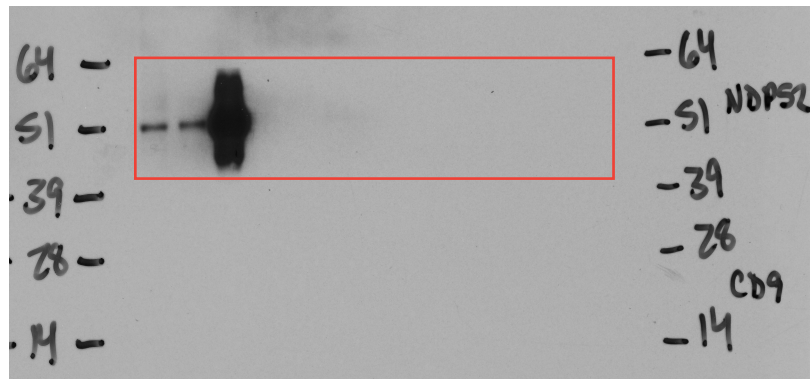

CD9 -  
WCL and  
EVPs (100K)  
in KOs  
Panel A

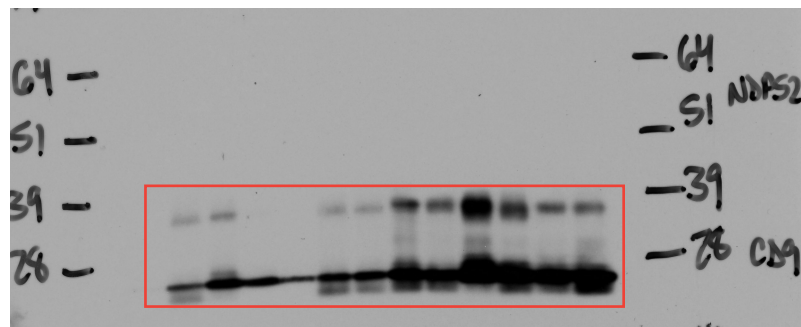

Supplement: JCB_202110151_SourceDataF5.pdf [file JCB_202110151_SourceDataF5.pdf]
