# Supplementary material for: Secretory autophagy maintains proteostasis upon lysosome inhibition
Source: PubMed Central journal article supplement — J Cell Biol. 2022 Apr 21;221(6):e202110151. doi: 10.1083/jcb.202110151 (PMC9036093; doi:10.1083/jcb.202110151), 2022-04-21
Supplement: JCB_202110151_SourceDataFS5.pdf [file JCB_202110151_SourceDataFS5.pdf]

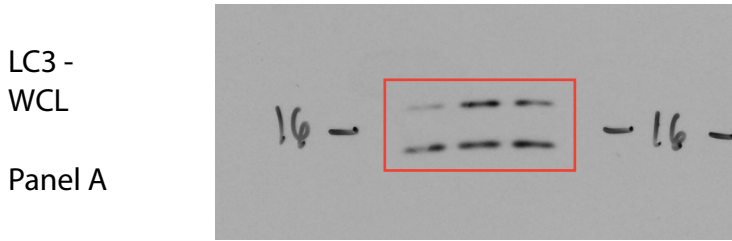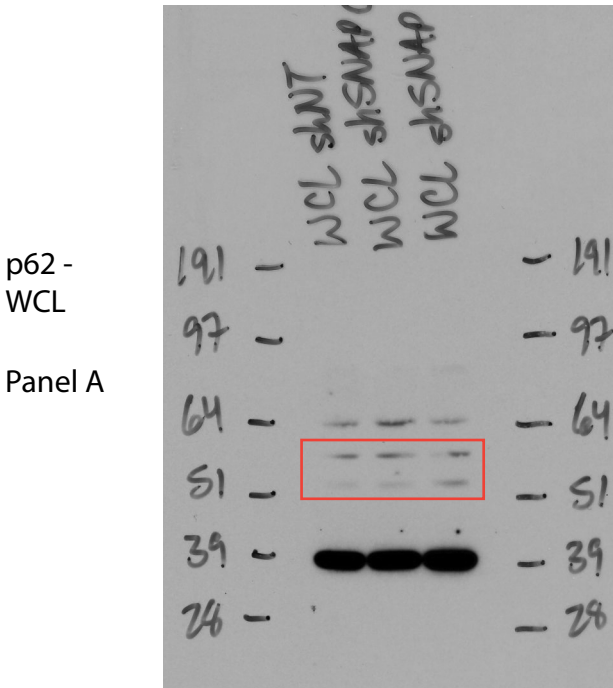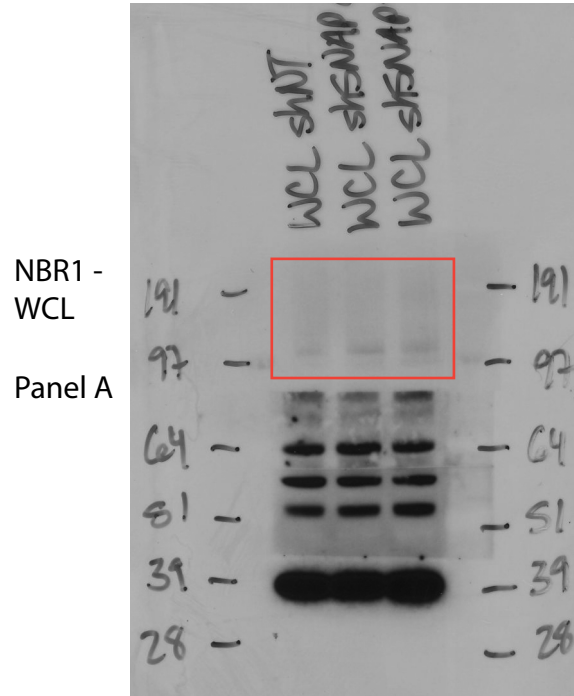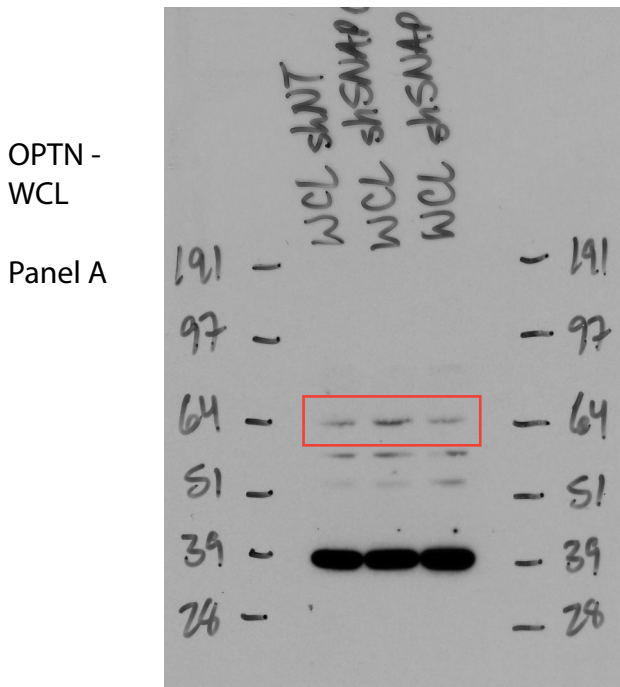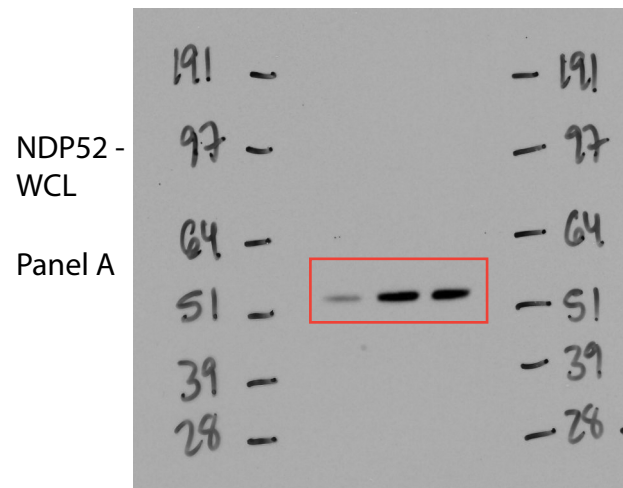

CD9 -  
WCL

Panel A

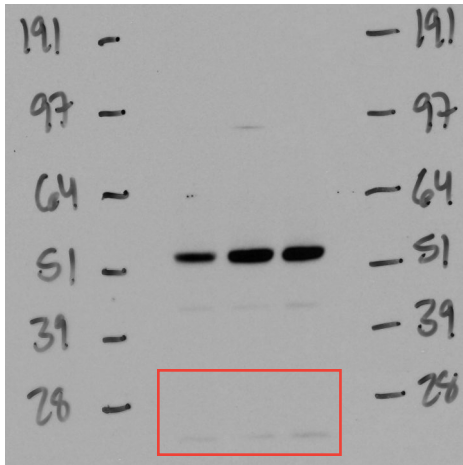

GAPDH -  
WCL

Panel A

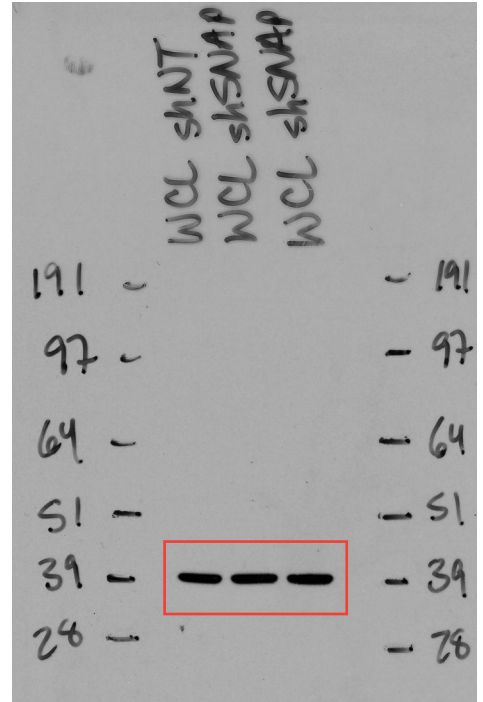

SNAP29 -  
WCL

Panel A

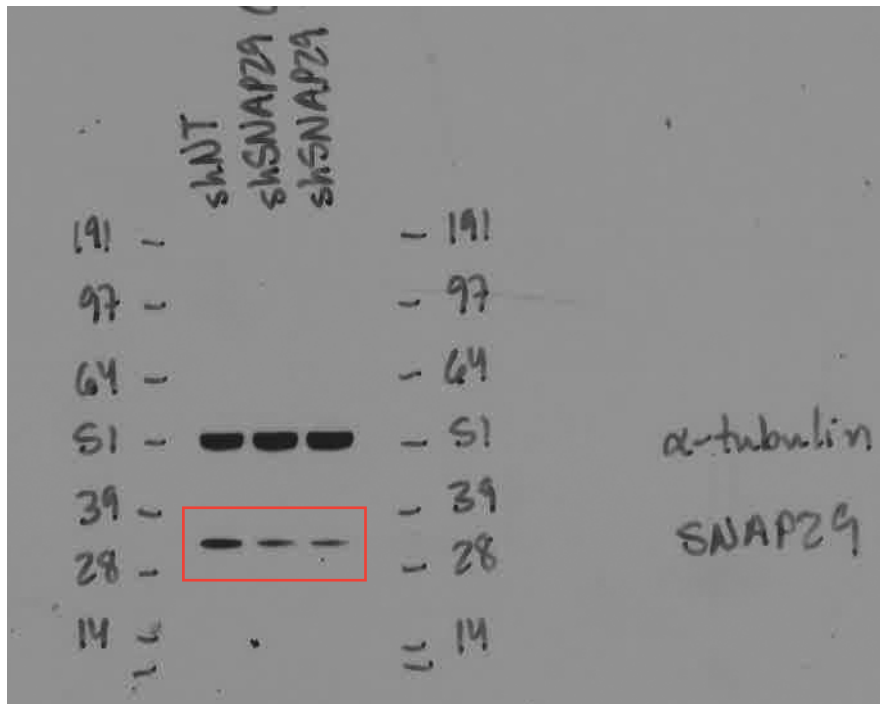



LC3 -  
WCL

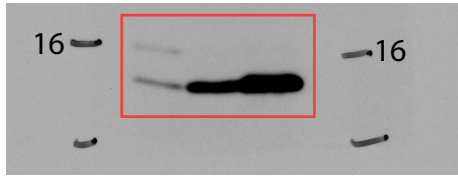

Panel B

p62 -  
WCL

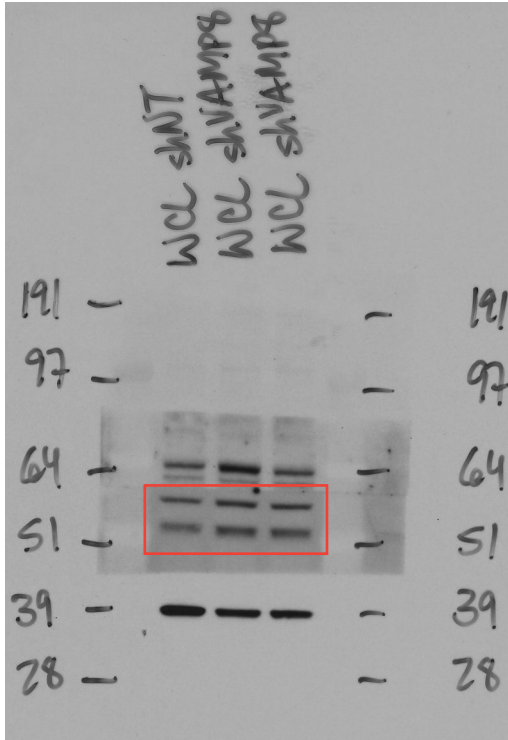

Panel B

NBR1 -  
WCL

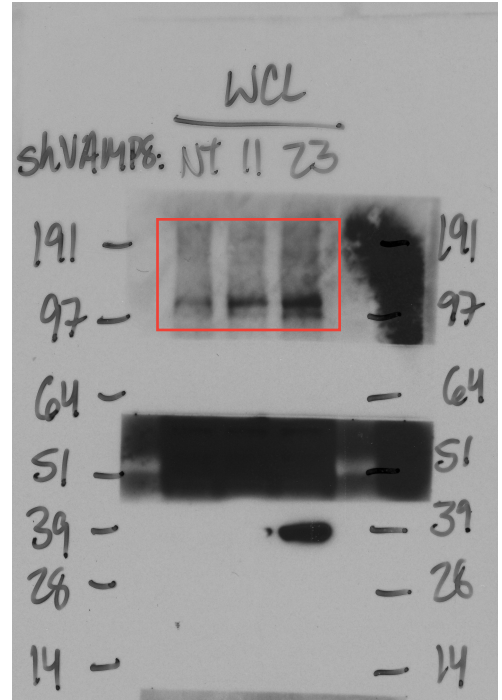

Panel B

OPTN -  
WCL

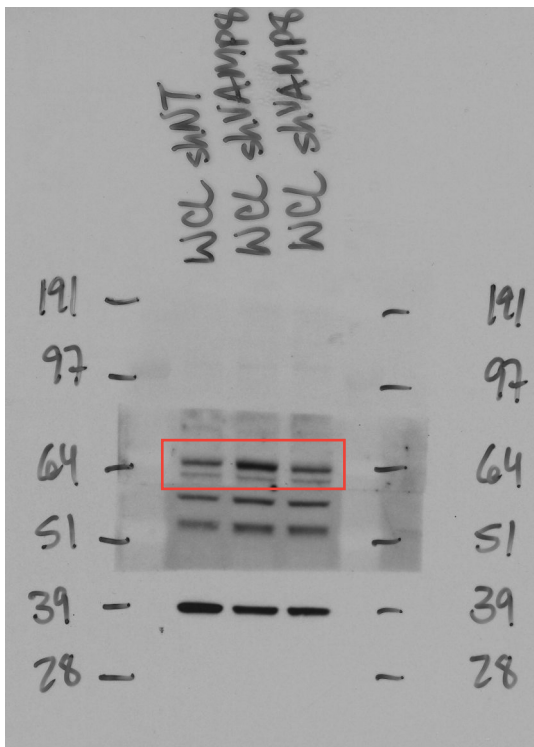

Panel B

NDP52 -  
WCL

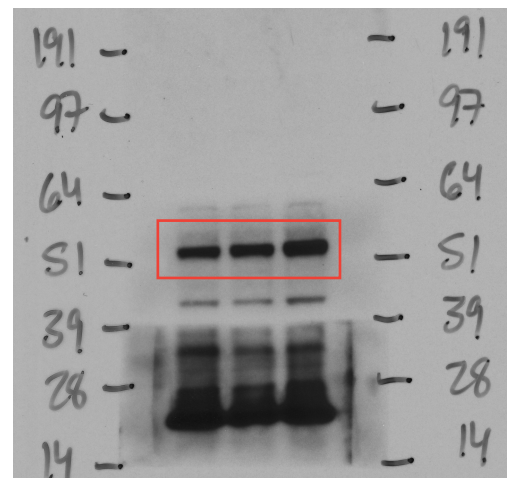

Panel B

CD9 -  
WCL

Panel B

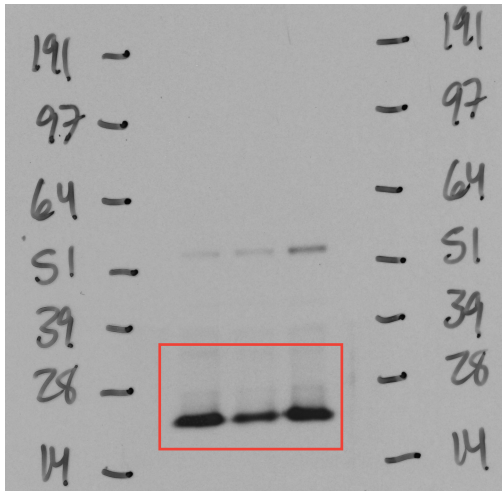

GAPDH -  
WCL

Panel B

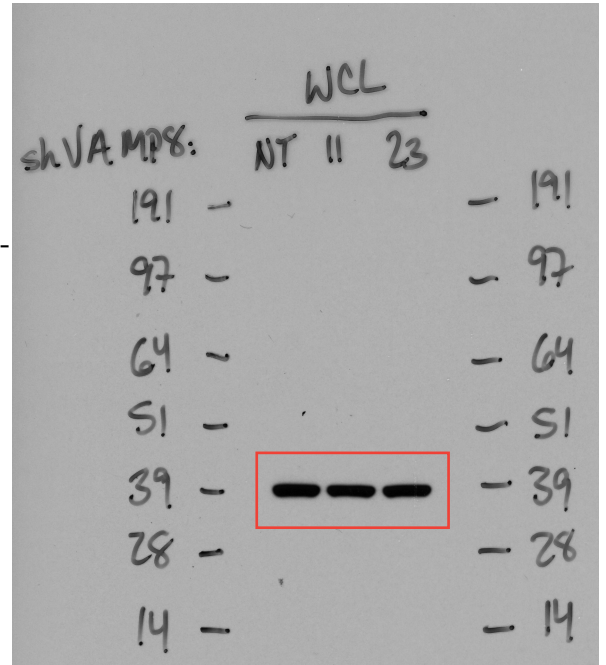

VAMP8 -  
WCL

Panel B

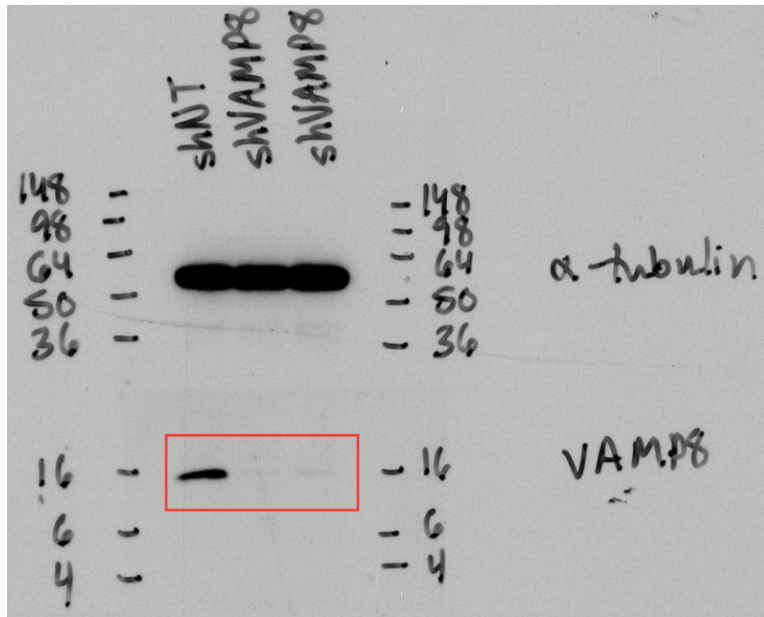

LC3 -  
WCL  
Panel C

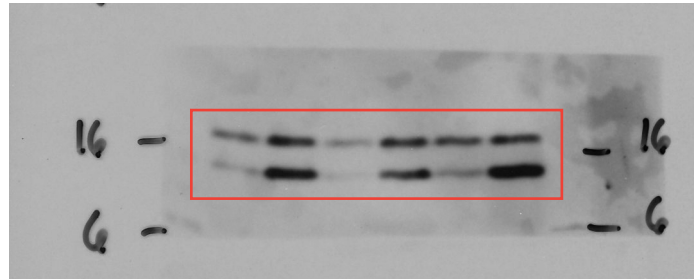

p62 -  
WCL  
Panel C

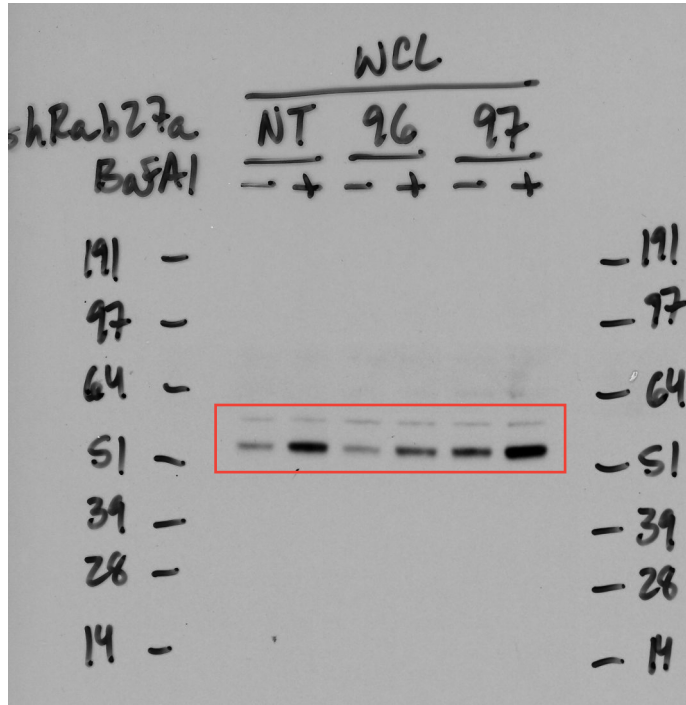

NBR1 -  
WCL  
Panel C

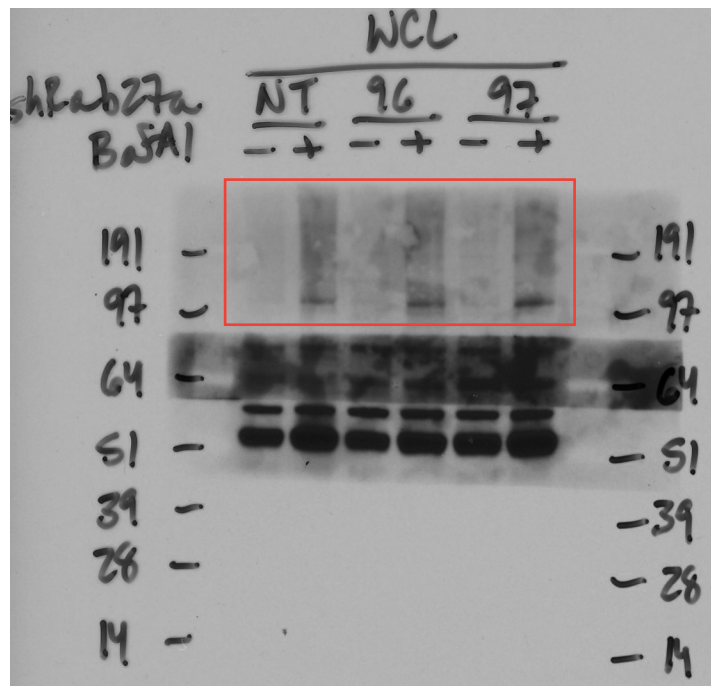

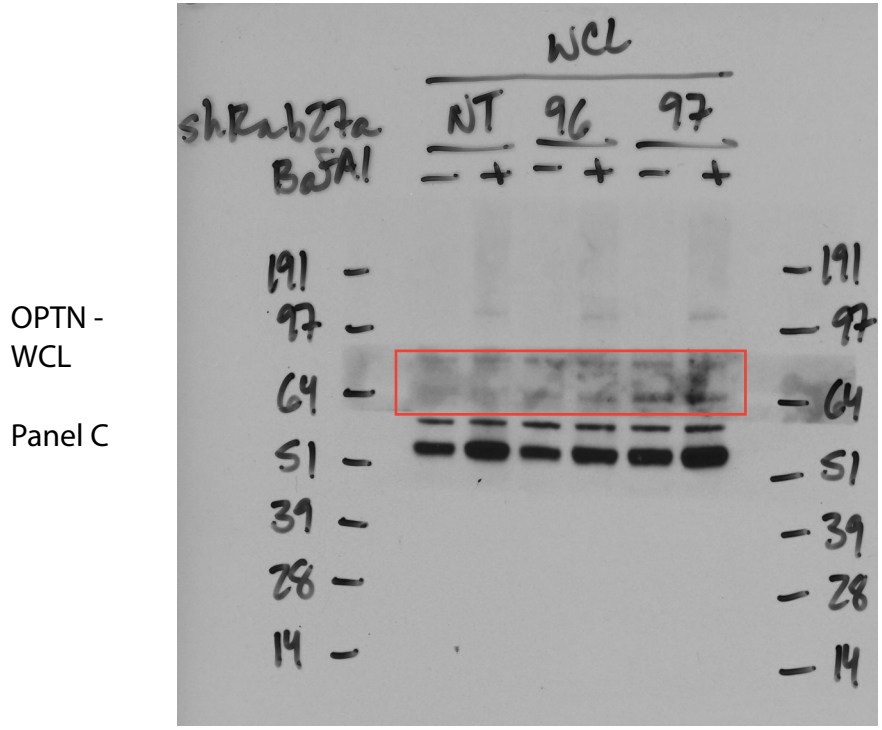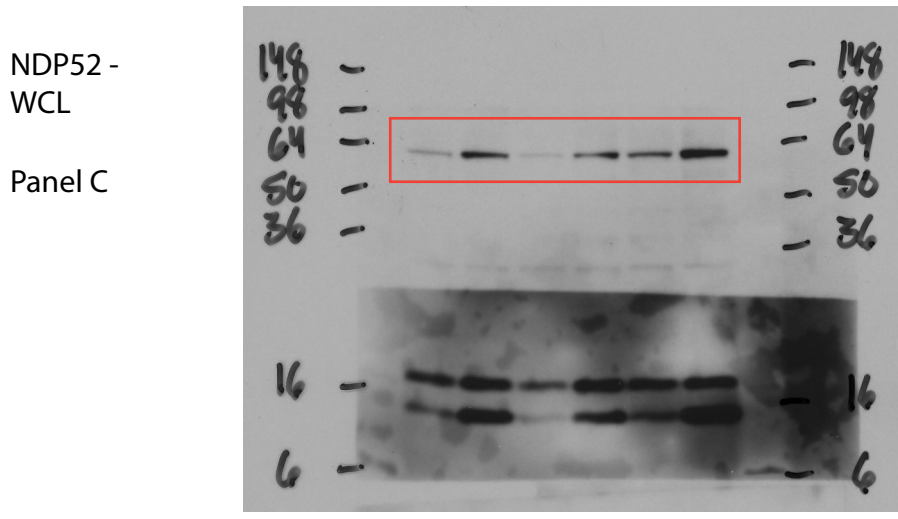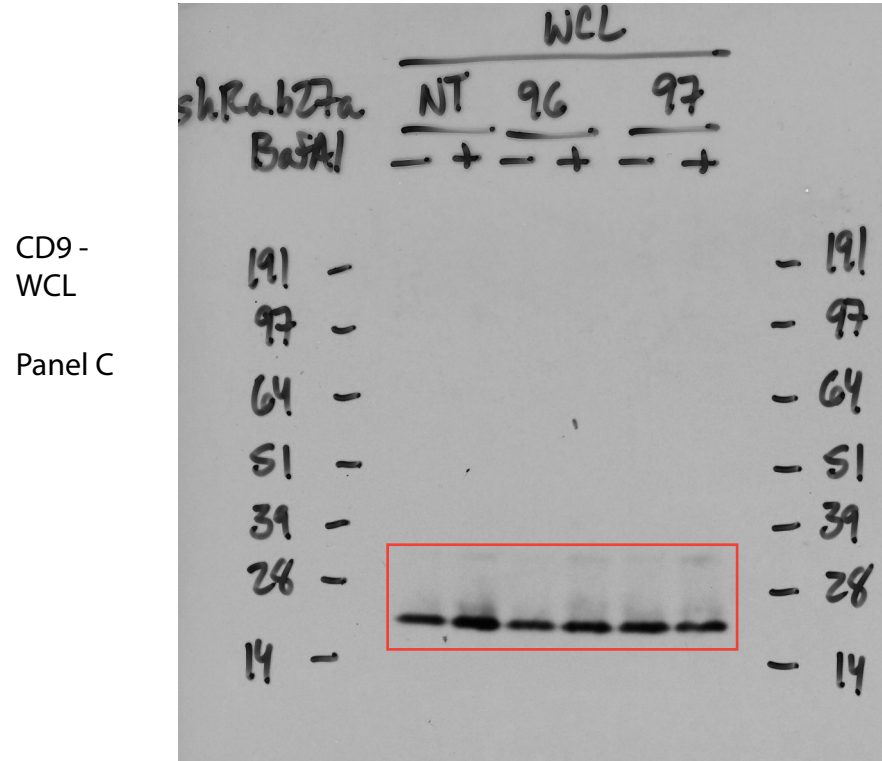

Rab27a -  
WCL

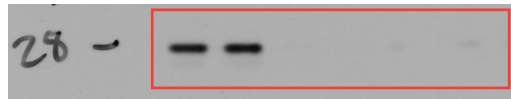

Panel C

GAPDH -  
WCL

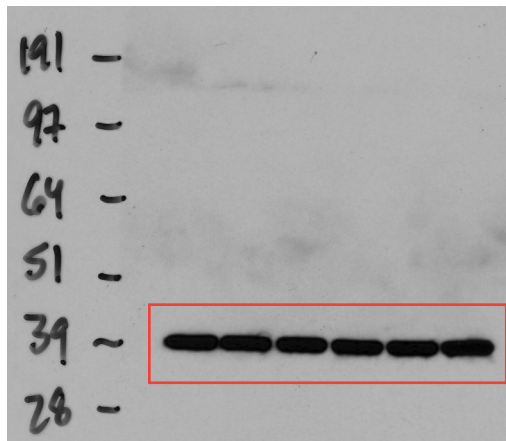

Panel C
