# Supplementary figures and images for: Secretory autophagy maintains proteostasis upon lysosome inhibition
Source: PubMed Central journal article supplement — J Cell Biol. 2022 Apr 21;221(6):e202110151. doi: 10.1083/jcb.202110151 (PMC9036093; doi:10.1083/jcb.202110151), 2022-04-21

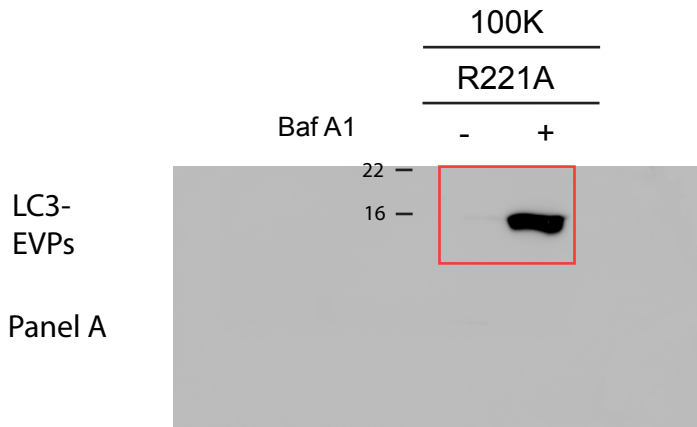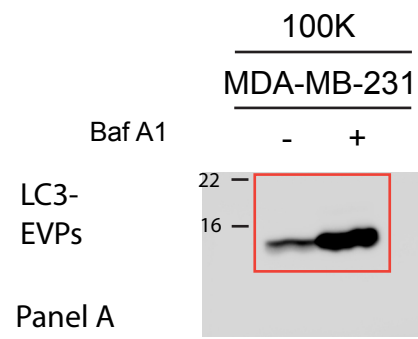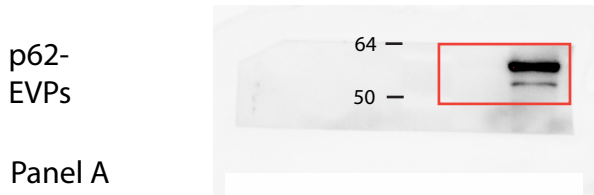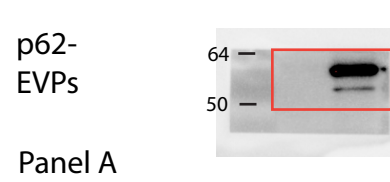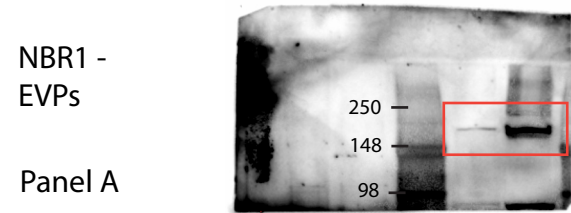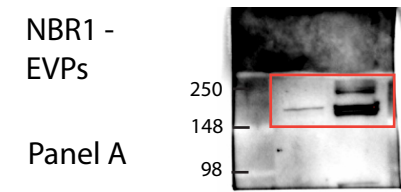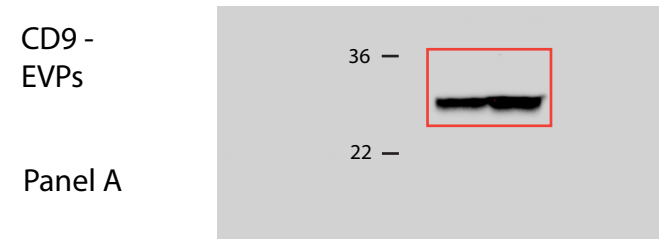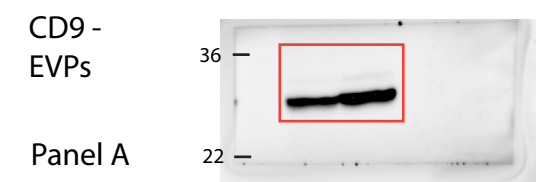

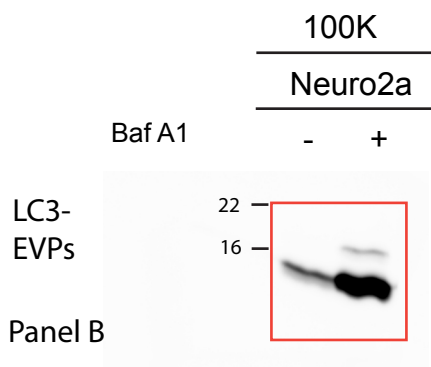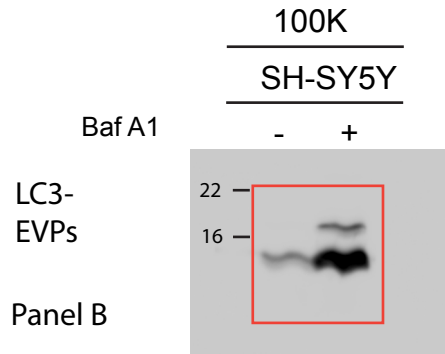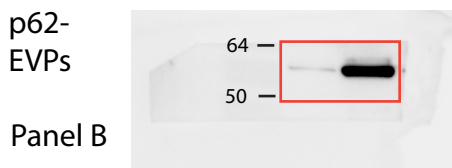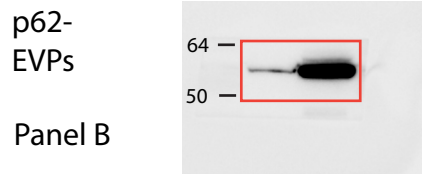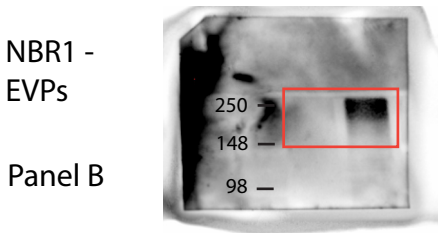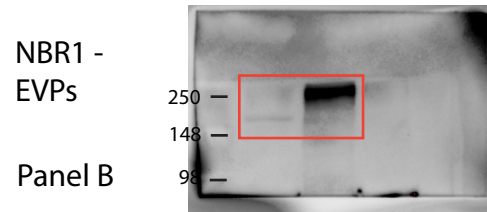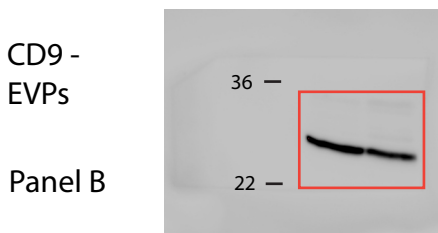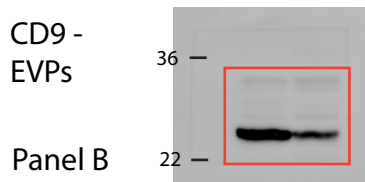

Supplement: JCB_202110151_SourceDataFS3.pdf [file JCB_202110151_SourceDataFS3.pdf]
